# Supplementary material for: Proteomic Analysis of Membrane Blebs of Brucella abortus 2308 and RB51 and Their Evaluation as an Acellular Vaccine
Source: Front Microbiol. 2019 Nov 29;10:2714. doi: 10.3389/fmicb.2019.02714 (PMC6895012; doi:10.3389/fmicb.2019.02714)
Supplement: TABLE S1 — Annotation of identified proteins of membrane blebs from B. abortus 2308 by LC-MS/MS. [file Table_1.xlsx]

## Sheet: Hoja1
	Table 1S. Annotation of identified proteins of membrane blebs from B. abortus 2308 by LC-MS/MS
Accession	Description	ΣCoverage	# AAs	MW [kDa]	calc. pI	Gene	Locus Tag	Subcellular location	COG/GO annotation	Protein domain (motif scan)
Q2YKJ4	Uncharacterized protein OS=Brucella abortus (strain 2308) GN=BAB2_0665 PE=4 SV=1 - [Q2YKJ4_BRUA2]	87.8	205	22	9.13		BAB2_0665	OM	COG5342	33-165 aa pfam_ls:IalBInvasion associated locus B (IalB) protein
Q2YK18	Probable acid stress chaperone HdeA OS=Brucella abortus (strain 2308) GN=hdeA PE=3 SV=1 - [HDEA_BRUA2]	86.84	114	12.3	6.59	hdeA	BAB2_0862	P*		36-114 aa pfam_ls:HdeA hns-dependent expression protein A (HdeA)
Q2YMJ7	DSBA oxidoreductase: Twin-arginine translocation pathway signal sequence domain-containing protein OS=Brucella abortus (strain 2308) GN=BAB1_0521 PE=4 SV=1 - [Q2YMJ7_BRUA2]	86.67	217	23.8	6.43		BAB1_0521	P	COG1651	62-214 aa pfam_ls:DSBA DSBA-like thioredoxin domain
Q2YME6	Uncharacterized protein OS=Brucella abortus (strain 2308) GN=BAB1_0466 PE=4 SV=1 - [Q2YME6_BRUA2]	84.3	121	12.9	5.04		BAB1_0466	OM	COG3895	45-118 aa pfam_ls:DUF2091 Predicted periplasmic protein (DUF2091)
Q2YRU5	MotY protein:Bacterial outer membrane protein:OmpA/MotB domain OS=Brucella abortus (strain 2308) GN=BAB1_1226 PE=3 SV=1 - [Q2YRU5_BRUA2]	83.95	220	23	9.55		BAB1_1226	OM	COG2885	113-208 aa pfam_ls:OmpA OmpA family
Q2YQM2	Uncharacterized protein OS=Brucella abortus (strain 2308) GN=BAB1_1308 PE=4 SV=1 - [Q2YQM2_BRUA2]	83.59	155	15.7	9.67		BAB1_1308	OM		126-151 aa prf:ALA_RICH Alanine-rich region profile.
Q2YIY2	Periplasmic binding protein/LacI transcriptional regulator OS=Brucella abortus (strain 2308) GN=rbsB-2 PE=4 SV=1 - [Q2YIY2_BRUA2]	79.68	315	33.2	5.11	rbsB-2	BAB2_0377	P	COG1879	26-307 aa pfam_ls:Peripla_BP_1 Periplasmic binding proteins and sugar binding domain of the LacI family
Q2YN61	Uncharacterized protein OS=Brucella abortus (strain 2308) GN=BAB1_0729 PE=4 SV=1 - [Q2YN61_BRUA2]	77.78	174	17.7	10.29		BAB1_0729	P*		25-171 aa pfam_ls:DUF992 Protein of unknown function (DUF992)
Q2YQT4	Lipoprotein putative OS=Brucella abortus (strain 23018) GN=BAB1_2148 PE=4 SV=1 - [Q2YQT4_BRUA2]	76.64	107	12.3	9.79		BAB1_2148	P*		1-34 aa prf:PROKAR_LIPOPROTEIN Prokaryotic membrane lipoprotein
Q2YLI0	Uncharacterized protein OS=Brucella abortus (strain 2308) GN=BAB1_1814 PE=4 SV=1 - [Q2YLI0_BRUA2]	76.17	193	20.3	9.26		BAB1_1814	P*	COG5468	60-187 aa pfam_ls:DUF2159 Predicted secreted (periplasmic) protein (DUF2159)
Q2YN61	Uncharacterized protein OS=Brucella abortus (strain 2308) GN=BAB1_0729 PE=4 SV=1 - [Q2YN61_BRUA2]	73.56	174	17.6	10.29		BAB1_0729	P		25-171 aa pfam_ls:DUF992 Protein of unknown function (DUF992)
Q2YQH3	Outer membrane lipoprotein omp16 OS=Brucella abortus (strain 2308) GN=OMP16 PE=3 SV=1 - [Q2YQH3_BRUA2]	73.21	168	18.2	9.92	omp16	BAB1_1707	OM	COG2885	51-167 aa prf:OMPA_2 OmpA-like domain profile.
Q2YN33	OmpA-like transmembrane domain OS=Brucella abortus (strain 2308) GN=BAB1_0722 PE=4 SV=1 - [Q2YN33_BRUA2]	70.89	213	23.2	8.58	omp25	BAB1_0722	OM	COG3637	97-213 aa pfam_ls:Opacity Opacity family porin protein
Q2YQA6	Uncharacterized protein OS=Brucella abortus (strain 2308) GN=BAB1_1612 PE=4 SV=1 - [Q2YQA6_BRUA2]	70.71	198	21.2	7.85		BAB1_1612	IM	COG5400	38-198 aa pfam_ls:DUF1134 Protein of unknown function (DUF1134)
Q2YQ61	Uncharacterized protein OS=Brucella abortus (strain 2308) GN=BAB1_1029 PE=4 SV=1 - [Q2YQ61_BRUA2]	69.66	178	18.9	7.97		BAB1_1029	P	COG3184	65-154 aa pfam_ls:DUF2059 Uncharacterized protein conserved in bacteria (DUF2059)
Q2YRD7	Protein TolB OS=Brucella abortus (strain 2308) GN=tolB PE=3 SV=1 - [TOLB_BRUA2]	68.85	443	48.5	8.95	tolB	BAB1_1709	P	COG0823	11-438 aa hamap:TOLB_MF_00671 Protein tolB
Q2YQ49	Uncharacterized protein OS=Brucella abortus (strain 2308) GN=BAB1_1041 PE=4 SV=1 - [Q2YQ49_BRUA2]	68	200	21.6	9.8		BAB1_1041	IM	COG3218	15-193 aa pfam_ls:DUF330 Protein of unknown function (DUF330)
Q2YN89	Uncharacterized protein OS=Brucella abortus (strain 2308) GN=BAB1_0758 PE=4 SV=1 - [Q2YN89_BRUA2]	67.61	82	8.3	10.5		BAB1_0758	EC		27-64 aa prf:GLY_RICH Glycine-rich region profile.
Q2YMU9	Outer membrane lipoprotein-related protein OS=Brucella abortus (strain 2308) GN=BAB1_0630 PE=4 SV=1 - [Q2YMU9_BRUA2]	67.33	161	16.8	9.04		BAB1_0630	OM	COG4520
Q2YRA6	50S ribosomal protein L24 OS=Brucella abortus (strain 2308) GN=rplX PE=3 SV=1 - [RL24_BRUA2]	66.99	103	11.2	10.24	rplX	BAB1_1244	C	COG0198	2-95 aa hamap:RL24_MF_01326_B50S ribosomal protein L24
Q2YMK7	Lipoprotein putative OS=Brucella abortus (strain 2308) GN=BAB1_0511 PE=4 SV=1 - [Q2YMK7_BRUA2]	66.67	192	20.8	9.11		BAB1_0511	OM		1-26 aa prf:PROKAR_LIPOPROTEIN
Q2YJV3	Periplasmic binding protein/LacI transcriptional regulator OS=Brucella abortus (strain 2308) GN=BAB2_0938 PE=4 SV=1 - [Q2YJV3_BRUA2]	66.15	350	36.6	5.74		BAB2_0938	P	COG4213	27-293 aa pfam_ls:Peripla_BP_1
Q2YMS0	Uncharacterized protein OS=Brucella abortus (strain 2308) GN=BAB1_0587 PE=4 SV=1 - [Q2YMS0_BRUA2]	65.97	120	12.1	4.61		BAB1_0587	C
Q2YQB8	Periplasmic binding protein/LacI transcriptional regulator OS=Brucella abortus (strain 2308) GN=BAB1_1648 PE=4 SV=1 - [Q2YQB8_BRUA2]	65.96	329	35.3	4.92		BAB1_1648	P	COG1879
Q2YIJ3	60 kDa chaperonin OS=Brucella abortus (strain 2308) GN=groL PE=3 SV=1 - [CH60_BRUA2]	64.65	546	57.5	5.08	groL	BAB2_0189	C	COG0459
Q2YN49	Peptidyl-prolyl cis-trans isomerase, putative surA OS=Brucella abortus (strain 2308) GN=BAB1_0706 PE=4 SV=1 - [Q2YN49_BRUA2]	63.96	318	35.2	9.8		BAB1_0706	P	COG0760	35-162 aa pfam_ls:SurA_N SurA N-terminal domain
Q2YRF8	Membrane protein, putative OS=Brucella abortu (strain 2308) GN=BAB1_1302 PE=4 SV=1 - [Q2YRF8_BRUA2]	63.68	212	22.2	9.02		BAB1_1302	OM	COG3637
Q2YJA9	Leu/Ile/Val-binding protein homolog 5 OS=Brucella abortus (strain 2308) GN=BAB2_1153 PE=4 SV=1 - [LIVB5_BRUA2]	62.94	406	44.2	5.64		BAB2_1153	P	COG0683	51-380 aa pfam_ls:ANF_receptor Receptor family ligand binding region
Q2YMR8	ErfK/YbiS/YcfS/YnhG:Twin-arginine translocation pathway signal OS=Brucella abortus (strain 2308) GN=BAB1_0589 PE=4 SV=1 - [Q2YMR8_BRUA2]	62.09	238	26.3	8.96		BAB1_0589	P	COG1376	98-237 aa pfam_ls:YkuD Ykud domain
Q2YKV9	Superoxide dismutase [Cu-Zn] OS=Brucella abortus (strain 2308) GN=sodC PE=3 SV=1 - [Q2YKV9_BRUA2]	61.59	173	18.1	6.24	sodC	BAB2_0535	P	COG2032	26-173 aa pfam_ls:Sod_Cu Copper/zinc superoxide dismutase (SODC)
Q2YRQ2	Outer membrane protein assembly factor BamA OS=Brucella abortus (strain 2308) GN=bamA PE=3 SV=1 - [Q2YRQ2_BRUA2]	61.08	781	85.9	5.37	bamA	BAB1_1176	OM	COG4775	187-275 aa pfam_ls:Surf_Ag_VNR Surface antigen variable number repeat
Q2YPX4	Histone-like bacterial DNA-binding protein OS=Brucella abortus (strain 2308) GN=L273_01088 PE=3 SV=1 - [Q2YPX4_BRUA2]	60.44	91	9.1	9.77		BAB1_1129	C	COG0776	45-65 aa pat:HISTONE_LIKE Bacterial histone-like DNA-binding proteins signature.
Q2YPK5	Invasion protein B homolog BAB1_0368 OS=Brucella abortus (strain 2308) GN=BAB1_0368 PE=4 SV=1 - [Y368_BRUA2]	60.28	173	18	8.98		BAB1_0368	P	COG5342	37-169 aa pfam_ls:IalB Invasion associated locus B (IalB) protein
Q2YR20	Uncharacterized protein OS=Brucella abortus (strain 2308) GN=BAB1_2054 PE=4 SV=1 - [Q2YR20_BRUA2]	60.12	321	33.3	5.43		BAB1_2054	P	COG2984	28-320 aa pfam_fs:ABC_sub_bind ABC transporter substrate binding protein
Q2YQF2	Prokaryotic sulfate-/thiosulfate-binding protein:Bacterial extracellular solute-binding protein, family 1 OS=Brucella abortus (strain 2308) GN=BAB1_1351 PE=4 SV=1 - [Q2YQF2_BRUA2]	58.65	334	37.2	5.41		BAB1_1351	P	COG4150	35-276 aa pfam_fs:SBP_bac_1 Bacterial extracellular solute-binding protein
Q2YRS4	OmpW family OS=Brucella abortus (strain 2308) GN=BAB1_1579 PE=4 SV=1 - [Q2YRS4_BRUA2]	58.45	227	24.5	6.11		BAB1_1579	OM	COG3047	41-227 aa pfam_ls:OmpW OmpW family
Q2YRT2	50S ribosomal protein L18 OS=Brucella abortus (strain 2308) GN=rplR PE=3 SV=1 - [RL18_BRUA2]	58.33	120	12.7	10.77	rplR	BAB1_1239	C	COG0256	3-120 aa pfam_fs:Ribosomal_L18p Ribosomal L18p/L5e family
Q2YIU6	Uncharacterized protein BAB2_0314 OS=Brucella abortus (strain 2308) GN=BAB2_0314 PE=4 SV=1 - [Y314_BRUA2]	57.75	284	31.6	5.28		BAB2_0314	OM	COG3637	3-283 aa pfam_ls:Surface_Ag_2 Surface antigen
Q2YRI6	Uncharacterized protein OS=Brucella abortus (strain 2308) GN=BAB1_1652 PE=4 SV=1 - [Q2YRI6_BRUA2]	57.14	105	11.3	5.64		BAB1_1652	P	COG5591
Q2YM04	50S ribosomal protein L4 OS=Brucella abortus (strain 2308) GN=rplD PE=3 SV=1 - [RL4_BRUA2]	56.31	206	22.6	10.12	rplD	BAB1_1254	C	COG0088	15-204 aa pfam_ls:Ribosomal_L4 Ribosomal protein L4/L1 family
Q2YRV5	Tetracycline resistance protein TetB OS=Brucella abortus (strain 2308) GN=BAB1_1216PE=4 SV=1 - [Q2YRV5_BRUA2]	56.23	329	34.3	6.92		BAB1_1216	P	COG2358
Q2YRF8	Membrane protein, putative OS=Brucella abortus (strain 2308) GN=BAB1_1302 PE=4 SV=1 - [Q2YRF8_BRUA2]	56.13	212	22.2	9.02		BAB1_1302	OM	COG3637
Q2YK97	Twin-arginine translocation pathway signal OS=Brucella abortus (strain 2308) GN=BAB2_0767 PE=4 SV=1 - [Q2YK97_BRUA2]	55.88	340	36.2	6.61		BAB2_0767	IM	COG0715
Q2YND9	30S ribosomal protein S9 OS=Brucella abortus (strain 2308) GN=rpsI PE=3 SV=1 - [RS9_BRUA2]	55.7	158	17.2	10.34	rpsI	BAB1_0810	C	COG0103	38-158 aa pfam_ls:Ribosomal_S9 Ribosomal protein S9/S16
Q2YMY7	Porin omp2b OS=Brucella abortus (strain 2308) GN=Omp2b PE=4 SV=1 - [OMP2B_BRUA2]	55.3	362	38.7	4.58	omp2b	BAB1_0660	OM		1-355 aa pfam_fs:Porin_2 Porin subfamily
Q2YLZ4	Outer membrane protein assembly factor BamD OS=Brucella abortus (strain 2308) GN=bamD PE=3 SV=1 - [Q2YLZ4_BRUA2]	55.05	287	32.1	8.66	bamD	BAB1_1441	OM	COG4105	47-117 aa prf:TPR_REGION TPR repeat region circular profile.
Q2YLK2	Lytic murein transglycosylase, putative OS=Brucella abortus (strain 2308) GN=BAB1_1836 PE=4 SV=1 - [Q2YLK2_BRUA2]	54.91	275	29.4	9.41		BAB1_1836	P*	COG2951
Q2YQC2	OmpA-like transmembrane domain OS=Brucella abortus (strain 2308) GN=Omp31-1 PE=4 SV=1 - [Q2YQC2_BRUA2]	54.55	261	27.7	4.99	omp31-1	BAB1_1639	OM	COG3637	189-261 aa pfam_fs:Opacity Opacity family porin protein
Q2YRY0	Substrate-binding region of ABC-type glycine betaine transport system OS=Brucella abortus (strain 2308) GN=BAB1_1593 PE=4 SV=1 - [Q2YRY0_BRUA2]	54.19	322	34.9	5.18		BAB1_1593	IM	COG2113	38-292 aa pfam_ls:OpuAC Substrate binding domain of ABC-type glycine betaine transport system
Q2YLR6	Outer membrane lipoprotein omp19 OS=Brucella abortus (strain 2308) GN=omp19 PE=3 SV=1 - [OMP19_BRUA2]	53.76	177	17.6	8.91	omp19	BAB1_1930	OM		1-177 aa pfam_fs:OMP_19 Bacterial outer membrane lipoprotein omp19
Q2YLX9	Lipoprotein putative OS=Brucella abortus (strain 2308) GN=BAB1_1548 PE=4 SV=1 - [Q2YLX9_BRUA2]	52.78	184	19.3	6.4		BAB1_1548	P		1-23 aa prf:PROKAR_LIPOPROTEIN
Q2YKV7	Bacterial extracellular solute-binding protein, family 1 OS=Brucella abortus (strain 2308) GN=BAB2_0539 PE=4 SV=1 - [Q2YKV7_BRUA2]	52.51	339	36.5	5.2		BAB2_0539	P	COG1840	29-283 aa pfam_fs:SBP_bac_1 Bacterial extracellular solute-binding protein
Q2YNY4	Outer membrane protein, putative OS=Brucella abortus (strain 2308) GN=BAB1_0115 PE=4 SV=1 - [Q2YNY4_BRUA2]	52.17	230	24.7	9.28		BAB1_0115	OM	COG3637	1-49; 171-226 aa pfam_fs:Porin_2 Porin subfamily
Q2YRA9	30S ribosomal protein S8 OS=Brucella abostus (strain 2308) GN=rpsH PE=3 SV=1 - [RS8_BRUA2]	51.52	132	14.6	9.62	rpsH	BAB1_1241	C	COG0096	102-119 aa pat:RIBOSOMAL_S8 Ribosomal protein S8 signature.
Q2YLZ9	30S ribosomal protein S7 OS=Brucella abortus (strain 2308) GN=rpsG PE=3 SV=1 - [RS7_BRUA2]	51.28	156	17.6	10.17	rpsG	BAB1_1259	C	COG0049	1-149 aa pfam_fs:Ribosomal_S7 Ribosomal protein S7p/S5e
Q2YM72	Uncharacterized protein OS=Brucella abortus (strain 2308) GN=BCETI_3000570 PE=4 SV=1 - [Q2YM72_BRUA2]	51.2	143	15.4	9.69		BAB1_1295	IM
Q2YQU1	Uncharacterized protein OS=Brucella abortus (strain 2308) GN=BAB1_2141 PE=4 SV=1 - [Q2YQU1_BRUA2]	51.15	348	37.2	5.17		BAB1_2141	P*	COG0226
Q2YM02	30S ribosomal protein S10 OS=Brucella abortus (stran 2308) GN=rpsJ PE=3 SV=1 - [RS10_BRUA2]	50.98	102	11.6	10.18	rpsJ	BAB1_1256	C	COG0051	3-102 aa hamap:RS10_MF_00508 30S ribosomal protein S10 [rpsJ]
Q2YLE5	Peptidase family M48:Neutral zinc metallopeptidases, zinc-binding region OS=Brucella abortus (strain 2308) GN=BAB1_1773 PE=4 SV=1 - [Q2YLE5_BRUA2]	50.95	493	52.7	9.49		BAB1_1773	OM	COG4784	141-150 aa pat:ZINC_PROTEASE Neutral zinc metallopeptidases
Q2YJ59	Uncharacterized protein OS=Brucella abortus (strain 2308) GN=BAB2_0223 PE=4 SV=1 - [Q2YJ59_BRUA2]	50.54	90	9.9	9.81		BAB2_0223	P
Q2YS14	Immunoreactive 28 kDa outer membrane protein OS=Brucella abortus (strain 2308) GN=omp28 PE=4 SV=1 - [Q2YS14_BRUA2]	50.4	250	26.6	5.66	omp28	BAB1_1494	OM	COG2968	40-249 aa pfam_fs:DUF541 Protein of unknown function (DUF541)
Q2YK03	Bacterial extracellular solute-binding protein, family 1 OS=Brucella abortus (strain 2308) GN=BAB2_0879 PE=4 SV=1 - [Q2YK03_BRUA2]	50.29	348	38.4	5.03		BAB2_0879	P*	COG0687	61-286 aa pfam_fs:SBP_bac_1 Bacterial extracellular solute-binding protein
Q2YS19	Uncharacterized protein OS=Brucella abortus (strain 2308) GN=BAB1_1489 PE=4 SV=1 - [Q2YS19_BRUA2]	50	267	30	4.83		BAB1_1489	OM
Q2YNC3	SmpA/OmlA OS=Brucella abortus (strain 2308) GN=BAB1_0794 PE=4 SV=1 - [Q2YNC3_BRUA2]	50	172	18.7	9.41		BAB1_0794	OM	COG2913	34-125 aa pfam_ls:SmpA_OmlA SmpA / OmlA family
Q2YKG1	Bacterial extracellular solute-binding protein, family 5 OS=Brucella abortus (strain 2308) GN=BAB2_0699 PE=4 SV=1 - [Q2YKG1_BRUA2]	49.52	525	58.6	5.2		BAB2_0699	P	COG4166	65-448 aa pfam_fs:SBP_bac_5 Bacterial extracellular solute-binding proteins, family 5 Middle
Q2YKG3	Uncharacterized protein OS=Brucella abortus (strain 2308) GN=BAB2_0697 PE=4 SV=1 - [Q2YKG3_BRUA2]	48.7	115	13.6	11.12		BAB2_0697	EC	COG5455
Q2YQV7	50S ribosomal protein L20 OS=Brucella abortus (strain 2308) GN=rplT PE=3 SV=1 - [RL20_BRUA2]	48.51	134	15.1	11.01	rplT	BAB1_2124	C	COG0292	2-115 aa hamap:RL20_MF_00382 50S ribosomal protein L20 [rplT]
Q2YLK6	30S ribosomal protein S16 OS=Brucella abortus (strain 2308) GN=rpsP PE=3 SV=1 - [RS16_BRUA2]	48.51	134	14.5	9.79	rpsP	BAB1_1832	C	COG0228	2-79 aa hamap:RS16_MF_00385 30S ribosomal protein S16 [rpsP]
Q2YMD8	Uncharacterized protein OS=Brucella abortus (strain 2308) GN=BAB1_0437 PE=4 SV=1 - [Q2YMD8_BRUA2]	48	86	9.5	4.97		BAB1_0437	C
Q2YR97	Electron transfer flavoprotein subunit beta OS=Brucella abortus (strain 2308) GN=etfB PE=4 SV=1 - [Q2YR97_BRUA2]	47.98	248	26.4	7.76	etfB	BAB1_1972	C	COG2086	23-183 aa pfam_fs:ETF Electron transfer flavoprotein domain
Q2YKZ2	ATP/GTP-binding site motif A (P-loop):Substrate-binding region of ABC-type glycine betaine transport system OS=Brucella abortus (strain 2308) GN=BAB2_0502 PE=4 SV=1 - [Q2YKZ2_BRUA2]	47.88	288	31.9	5.44		BAB2_0502	OM	COG2113	29-277 aa pfam_ls:OpuAC Substrate binding domain of ABC-type glycine betaine transport system
Q2YNU8	Lipolytic enzyme, G-D-S-L family OS=Brucella abortus (strain 2308) GN=BAB1_0081 PE=4 SV=1 - [Q2YNU8_BRUA2]	47.87	241	25.7	5.04		BAB1_0081	EC	COG2755	53-133 aa pre:LIPASE_GDSL Lipase/Acylhydrolase with GDSL-like motif.
Q2YK12	Uncharacterized protein OS=Brucella abortus (strain 2308) GN=BAB2_0868 PE=4 SV=1 - [Q2YK12_BRUA2]	47.46	177	18.5	5.02		BAB2_0868	EC	COG4803	60-161 aa pfam_fs:DUF1269 Protein of unknown function (DUF1269)
Q2YP67	Bacterial extracellular solute-binding protein, family 1 OS=Brucella abortus (strain 2308) GN=BAB1_0238 PE=4 SV=1 - [Q2YP67_BRUA2]	47.28	439	47.9	5.15		BAB1_0238	P	COG1653	42-346 aa pfam_fs:SBP_bac_1 Bacterial extracellular solute-binding protein
Q2YNK2	Uncharacterized protein OS=Brucella abortus (strain2308) GN=BAB1_0893 PE=4 SV=1 - [Q2YNK2_BRUA2]	47.23	235	24.8	4.98		BAB1_0893	IM	COG2979	27-231 aa pfam_ls:DUF533 Protein of unknown function (DUF533)
Q2YKU9	Bacterial extracellular solute-binding protein, family 1 OS=Brucella abortus (strain 2308) GN=BAB2_0547 PE=4 SV=1 - [Q2YKU9_BRUA2]	47.2	421	45.1	5.16		BAB2_0547	P	COG1653	39-320 aa pfam_fs:SBP_bac_1 Bacterial extracellular solute-binding protein
Q2YRU4	Transcriptional regulatory protein OS=Brucella abortus (strain 2308) GN=BAB1_1227 PE=4 SV=1 - [Q2YRU4_BRUA2]	46.91	194	21.9	10.48		BAB1_1227	IM	COG4764
Q2YM10	Transcription termination/antitermination protein NusG OS=Brucella abortus (strain 2308) GN=nusG PE=3 SV=1 - [Q2YM10_BRUA2]	46.86	175	19.7	6.64	nusG	BAB1_1269	C	COG0250	3-100 aa pfam_fs:NusG Transcription termination factor nusG
Q2YM12	50S ribosomal protein L1 OS=Brucella abortus (strain 2308) GN=rplA PE=3 SV=1 - [RL1_BRUA2]	46.78	233	24.6	9.52	rplA	BAB1_1267	C	COG0081	2-229 aa hamap:RL1_MF_01318_B 50S ribosomal protein L1 [rplA]
Q2YIV8	RNA-binding region RNP-1 (RNA recognition motif):TPR repeat OS=Brucella abortus (strain 2308) GN=BAB2_0271 PE=4 SV=1 - [Q2YIV8_BRUA2]	46.44	295	32.1	7.75		BAB2_0271	OM	COG0457
Q2YLR9	Malate dehydrogenase OS=Brucella abortus (strain 2308) BO1 GN=mdh PE=3 SV=1 - [MDH_BRUA2]	45.94	320	33.7	5.24	mdh	BAB1_1927	C	COG0039	4-144 aa pfam_fs:Ldh_1_N lactate/malate dehydrogenase, NAD binding domain
Q2YIP8	Omp10 OS=Brucella abortus (strain 2308) GN=omp10 PE=4 SV=1 - [Q2YIP8_BRUA2]	45.8	126	13.3	9.02	omp10	BAB2_0076	OM
Q2YRJ1	30S ribosomal protein S2 OS=Brucella abortus (strain 2308) GN=rpsB PE=3 SV=1 - [RS2_BRUA2]	45.7	256	28	5.86	rpsB	BAB1_1184	C	COG0052	2-232 aa hamap:RS2_MF_00291_B 30S ribosomal protein S2 [rpsB]
Q2YR05	Maf-like protein BAB1_2069 OS=Brucella abortus (strain 2308) GN=BAB1_2069 PE=3 SV=1 - [Y2069_BRUA2]	45.23	199	21.5	5.55		BAB1_2069	C	COG0424	4-198 aa hamap:MAF_MF_00528 Septum formation protein Maf [maf]
Q2YNY3	Outer membrane protein, putative OS=Brucella abortus (strain 2308) GN=BAB1_0116 PE=4 SV=1 - [Q2YNY3_BRUA2]	45.18	228	24.6	4.78		BAB1_0116	OM	COG3637	1-224 aa pfam_ls:Porin_2 Porin subfamily
Q2YQD0	TonB-dependent receptor protein OS=Brucella abortus (strain 2308) GN=BAB1_1367 PE=3 SV=1 - [Q2YQD0_BRUA2]	45.05	620	66.9	5.26		BAB1_1367	OM	COG4206	397-620 aa pfam_fs:TonB_dep_Rec TonB dependent receptor
Q2YM08	Elongation factor Tu OS=Brucella abortus (strain 2308) GN=tuf1 PE=1 SV=1 - [EFTU_BRUA2]	45.03	391	42.6	5.27	tuf1	BAB1_1257	C	COG0050	1-391 aa hamap:EFTU_MF_00118_B Elongation factor Tu [tuf]
Q2YRA7	50S ribosomal protein L5 OS=Brucella abortus (strain 2308) GN=rplE PE=3 SV=1 - [RL5_BRUA2]	44.86	185	21.1	9.54	rplE	BAB1_1243	C	COG0094	7-185 aa hamap:RL5_MF_01333_B 50S ribosomal protein L5 [rplE]
Q2YKU0	Solute-binding protein/glutamate receptor:Bacterial extracellular solute-binding protein, family 3 OS=Brucella abortus (strain 2308) GN=fliY PE=4 SV=1 - [Q2YKU0_BRUA2]	44.75	257	27.8	8.45	fliY	BAB2_0558	P	COG0834	36-253 aa pfam_fs:SBP_bac_3 Bacterial extracellular solute-binding proteins, family 3
Q2YRU1	50S ribosomal protein L17 OS=Brucella abortus (strain 2308) GN=rplQ PE=3 SV=1 - [RL17_BRUA2]	44.37	142	15.6	10.3	rplQ	BAB1_1230	C	COG0203	5-116 aa hamap:RL17_MF_01368 50S ribosomal protein L17 [rplQ]
Q2YR56	50S ribosomal protein L28 OS=Brucella abortus (strain 2308) GN=rpmB PE=3 SV=1 - [RL28_BRUA2]	44.33	97	10.9	10.65	rpmB	BAB1_2016	C	COG0227	1-68 aa hamap:RL28_MF_0037350S ribosomal protein L28 [rpmB]
Q2YLS0	Succinyl-CoA ligase [ADP-forming] subunit beta OS=Brucella abortus (strain 2308) GN=sucC PE=3 SV=1 - [Q2YLS0_BRUA2]	43.97	376	40.1	4.77	sucC	BAB1_1926	C	COG0045	1-374 aa hamap:SUCC_MF_00558 Succinyl-CoA ligase [ADP-forming] subunit beta [sucC]
Q2YS20	Choloylglycine hydrolase OS=Brucella abortus (strain 2308) GN=BAB1_1488 PE=4 SV=1 - [BAB1_1488]	43.92	333	36.8	5.62		BAB1_1488	EC	COG3049	3-320 aa pfam_ls:CBAH Linear amide C-N hydrolases, choloylglycine hydrolase family
Q2YN97	Putative peptidoglycan binding domain 1:Twin-arginine translocation pathway signal OS=Brucella abortus (strain 2308) GN=BAB1_0785 PE=4 SV=1 - [Q2YN97_BRUA2]	43.88	433	48.2	9.09		BAB1_0785	P	COG3049	115-173 aa pfam_ls:PG_binding_1 Putative peptidoglycan binding domain
Q2YL99	Uncharacterized protein OS=Brucella abortus (strain 2308) GN=BAB2_0010 PE=4 SV=1 - [Q2YL99_BRUA2]	43.37	202	22.7	9.61		BAB2_0010	P	COG5664	9-196 aa pfam_ls:DUF922 Bacterial protein of unknown function (DUF922)
Q2YMJ0	Uncharacterized protein OS=Brucella abortus (strain 2308) GN=BAB1_0491 PE=4 SV=1 - [Q2YMJ0_BRUA2]	42.93	198	20.5	5.42		BAB1_0491	IM	COG5342	64-198 aa pfam_fs:IalB Invasion associated locus B (IalB) protein
Q2YNZ8	Response regulator receiver:Helix-turn-helix, Fis-type OS=Brucella abortus (strain 2308) GN=BAB1_0136 PE=4 SV=1 - [Q2YNZ8_BRUA2]	42.78	187	20.8	6.19		BAB1_0136	C	COG4567	17-131 aa prf:RESPONSE_REGULATORY Response regulatory domain profile.
Q2YNB3	Polysaccharide export protein OS=Brucella abortus (strain 2308) GN=BAB1_0804 PE=4 SV=1 - [Q2YNB3_BRUA2]	42.56	195	21.2	9.27		BAB1_0804	OM	COG1596	35-118 aa pfam_fs:Poly_export Polysaccharide biosynthesis/export protein
Q2YM11	50S ribosomal protein L11 OS=Brucella abortus (strain 2308) GN=rplK PE=3 SV=1 - [RL11_BRUA2]	42.25	142	15	9.81	rplK	BAB1_1268	P	COG0080	1-141 aa hamap:RL11_MF_00736_B 50S ribosomal protein L11 [rplK]
Q2YL86	Leu/Ile/Val-binding protein homolog 4 OS=Brucella abortus (strain 2308) GN=BAB2_0023 PE=4 SV=1 - [BAB2_0023]	41.83	416	44.3	5.96		BAB2_0023	P	COG0683
Q2YNA6	Uncharacterized protein OS=Brucella abortus (strain 2308) GN=BAB1_0776 PE=4 SV=1 - [Q2YNA6_BRUA2]	41.46	398	42.7	5.08		BAB1_0776	P
Q2YRL9	Glutelin:Proline-rich region OS=Brucella abortus (strain 2308) GN=BAB1_1533 PE=4 SV=1 - [Q2YRL9_BRUA2]	41.29	170	18.8	9.95		BAB1_1533	P		138-168 aa pfam_ls:BA14K BA14K-like protein
Q2YPP8	Bacterial surface antigen (D15) OS=Brucella abortus (strain 2308) GN=BAB1_0045 PE=4 SV=1 - [Q2YPP8_BRUA2]	41.19	639	68.9	5.63		BAB1_0045	OM	COG0729	334-639 aa pfam_fs:Bac_surface_Ag Surface antigen
Q2YKP5	Solute-binding protein/glutamate receptor:Ionotropic glutamate receptor:Bacterial extracellular solute-binding protein, family 3 OS=Brucella abortus (strain 2308) GN=BAB2_0611 PE=3 SV=1 - [Q2YKP5_BRUA2]	41.02	257	27.9	4.66		BAB2_0611	P	COG0834	41-238 aa pre:SBP_GLUR Solute binding protein/glutamate receptor domain
Q2YL07	Periplasmic binding protein OS=Brucella abortus (strain 2308) GN=BAB2_0483 PE=4 SV=1 - [Q2YL07_BRUA2]	40.91	344	37.5	5.85		BAB2_0483	P	COG0614
Q2YJA1	Uncharacterized protein OS=Brucella abortus (strain 2308) GN=BAB2_0095 PE=4 SV=1 - [Q2YJA1_BRUA2]	40.6	234	25.7	6.15		BAB2_0095	P	COG3683	19-227 aa pfam_fs:DUF1007 Protein of unknown function (DUF1007)
Q2YJP1	Peptidase family U6, penicillin-insensitive murein endopeptidase OS=Brucella abortus (strain 2308) GN=mepA PE=4 SV=1 - [Q2YJP1_BRUA2]	40.45	340	37.2	9.74	mepA	BAB2_1008	P*	COG3770	81-329 aa pfam_fs:Peptidase_M74 Penicillin-insensitive murein endopeptidase
Q2YRA0	50S ribosomal protein L22 OS=Brucella abortus (strain 2308) GN=rplV PE=3 SV=1 - [RL22_BRUA2]	40.31	129	14.1	10.56	rplV	BAB1_1250	C	COG0091	13-122 aa hamap:RL22_MF_01331_B 50S ribosomal protein L22 [rplV]
Q2YQ44	Uncharacterized protein OS=Brucella abortus (strain 2308) GN=BAB1_1048 PE=4 SV=1 - [Q2YQ44_BRUA2]	40.29	206	23.8	9.96		BAB1_1048	C	COG5661	7-194 aa pfam_fs:DUF922 Bacterial protein of unknown function (DUF922)
Q2YQQ6	Glutelin:Lipoprotein YaeC family:NLPA lipoprotein OS=Brucella abortus (strain 2308) GN=BAB1_2176 PE=3 SV=1 - [Q2YQQ6_BRUA2]	39.93	259	27.9	5.24		BAB1_2176	IM	COG1464	24-259 aa pfam_fs:Lipoprotein_9 NLPA lipoprotein
Q2YQH5	Cell division coordinator CpoB OS=Brucella abortus (strain 2308) GN=cpoB PE=4 SV=1 - [Q2YQH5_BRUA2]	39.34	488	51.9	5.42	cpoB	BAB1_1705	P*		364-471 aa prf:TPR_REGION TPR repeat region circular profile
Q2YQP6	30S ribosomal protein S20 OS=Brucella abortus (strain 2308) GN=rpsT PE=3 SV=1 - [RS20_BRUA2]	39.05	88	9.7	11.63	rpsT	BAB1_2186	C	COG0268	1-85 aa hamap:RS20_MF_00500 30S ribosomal protein S20 [rpsT]
Q2YLP6	50S ribosomal protein L19 OS=Brucella abortus (strain 2308) GN=rplS PE=3 SV=1 - [RL19_BRUA2]	38.62	145	16.1	9.9	rplS	BAB1_1906	C	COG0335	3-119 aa hamap:RL19_MF_00402 50S ribosomal protein L19 [rplS]
Q2YKW0	Multicopper oxidase, type 1:Multicopper oxidase, copper-binding:Twin-arginine translocation pathway signal OS=Brucella abortus (strain 2308) GN=BAB2_05341 PE=4 SV=1 - [Q2YKW0_BRUA2]	38.39	631	68.4	6.04		BAB2_0534	C	COG2132	165-282; 345-408; 511-631 aa pfam_fs:Cu-oxidase Multicopper oxidase
Q2YPI7	Uncharacterized protein OS=Brucella abortus (strain 2308) GN=BAB1_0353 PE=4 SV=1 - [Q2YPI7_BRUA2]	37.7	77	9	5.15		BAB1_0353	C
Q2YQY0	PTS system fructose subfamily IIA component OS=Brucella abortus (strain 2308) GN=BAB1_2096 PE=4 SV=1 - [Q2YQY0_BRUA2]	37.59	133	14.4	5.01		BAB1_2096	C	COG2893	1-123 aa prf:PTS_EIIA_TYPE_4 PTS_EIIA type-4 domain profile
Q2YPS9	Bacterial transferase hexapeptide repeat OS=Brucella abortus (strain 2308) GN=BAB1_1434 PE=4 SV=1 - [Q2YPS9_BRUA2]	37.55	229	25.8	8.61		BAB1_1434	C	COG0110	43-60; 77-94; 132-19; 150-167 aa pfam_fs:Hexapep Bacterial transferase hexapeptide (three repeats)
Q2YR97	Electron transfer flavoprotein beta-subunit OS=Brucella abortus (strain 2308) GN=etfB PE=4 SV=1 - [Q2YR97_BRUA2]	37.5	248	26.4	7.76	etfB	BAB1_1972	C	COG2086	23-183 aa pfam_fs:ETF Electron transfer flavoprotein domain
Q2YK40	UPF0423 protein BAB2_0840 OS=Brucella abortus (strain 2308) GN=BAB2_0840 PE=4 SV=1 - [Y840_BRUA2]	37.37	182	19.9	6.06		BAB2_0840	P	COG3470	22-175 aa pfam_fs:Iron_transport Fe2+ transport protein
Q2YJS1	DNA gyrase, subunit B:Short-chain dehydrogenase/reductase SDR:Glucose/ribitol dehydrogenase OS=Brucella abortus (strain 2308) GN=BAB2_0975 PE=4 SV=1 - [Q2YJS1_BRUA2]	37.3	252	26.4	6.21		BAB2_0975	C	COG1028	6-175 aa pfam_fs:adh_short short chain dehydrogenase
Q2YJ57	FAD:protein FMN transferase OS=Brucella abortus (strain 2308) GN=BAB2_0227 PE=4 SV=1 - [Q2YJ57_BRUA2]	37.23	325	35	6.8		BAB2_0227	IM	COG1477	45-298 aa pfam_fs:ApbE ApbE family
Q2YP13	RNA polymerase sigma-54 factor OS=Brucella abortus (strain 2308) GN=rpoN PE=3 SV=1 - [Q2YP13_BRUA2]	37.16	500	55	4.75	rpoN	BAB1_0157	C	COG1508	5-53; 125-319; 331-491 aa pfam_fs:Sigma54_CBD Sigma-54 factor, core binding domain
Q2YLL8	50S ribosomal protein L27 OS=Brucella abortus (strain 2308) GN=rpmA PE=3 SV=1 - [RL27_BRUA2]	37.08	89	9.4	10.75	rpmA	BAB1_1857	C	COG0211	1-84 aa hamap:RL27_MF_00539 50S ribosomal protein L27 [rpmA]
Q2YJ33	Uncharacterized protein OS=Brucella abortus (strain 2308) GN=BAB2_0195 PE=4 SV=1 - [Q2YJ33_BRUA2]	36.82	223	24.4	9.61		BAB2_0195	P
Q2YMD3	Phosphoribosylamine--glycine ligase OS=Brucella abortus (strain 2308) GN=purD PE=3 SV=1 - [Q2YMD3_BRUA2]	36.3	427	45	5.05	purD	BAB1_0442	C	COG0151	1-420 aa hamap:PUR2_MF_00138 Phosphoribosylamine--glycine ligase [purD]
Q2YR35	D-alanyl-D-alanine carboxypeptidase 1, S11 family OS=Brucella abortus (strain 2308) GN=BAB1_2037 PE=3 SV=1 - [Q2YR35_BRUA2]	36.22	371	39.9	9.66		BAB1_2037	IM	COG1686	29-247 aa pfam_fs:Peptidase_S11 D-alanyl-D-alanine carboxypeptidase
Q2YKG0	Bacterial extracellular solute-binding protein, family 5 OS=Brucella abortus (strain 2308) GN=BAB2_0700 PE=4 SV=1 - [Q2YKG0_BRUA2]	36.19	525	58.8	5.01		BAB2_0700	P	COG4166	65-448 aa pfam_fs:SBP_bac_5 Bacterial extracellular solute-binding proteins, family 5 Middle
Q2YJX1	ABC transporter, periplasmic binding protein, putative KO: K02051 sulfonate/nitrate transport system substrate-binding OS=Brucella abortus (strain 2308) GN=BAB2_0919 PE=4 SV=1 - [Q2YJX1_BRUA2]	36.18	346	36.8	5.31		BAB2_0919	P	COG0715	49-195 aa pfam_fs:NMT1 NMT1/THI5 like
Q2YND2	Uncharacterized protein OS=Brucella abortus (strain 2308) GN=BAB1_0819 PE=4 SV=1 - [Q2YND2_BRUA2]	36.09	133	14.5	9.67		BAB1_0819	P
Q2YMQ2	Xylose isomerase OS=Brucella abortus (strain 2308) GN=xylA PE=3 SV=1 - [XYLA_BRUA2]	35.86	435	49	5.34	xylA	BAB1_0570	C	COG2115	12-435 aa hamap:XYLA_MF_00455 Xylose isomerase [xylA]
Q2YNH3	Uncharacterized protein OS=Brucella abortus (strain 2308) GN=BAB1_0847 PE=4 SV=1 - [Q2YNH3_BRUA2]	35.77	137	14.8	9.87		BAB1_0847	P
Q2YPP6	ErfK/YbiS/YcfS/YnhG OS=Brucella abortus (strain 2308) GN=BAB1_0047 PE=4 SV=1 - [Q2YPP6_BRUA2]	35.68	241	26.7	9.28		BAB1_0047	P	COG1376	104-240 aa pfam_fs:YkuD Ykud domain
Q2YM63	Ribosomal RNA small subunit methyltransferase H OS=Brucella abortus (strain 2308) GN=rsmH PE=3 SV=1 - [RSMH_BRUA2]	35.55	346	37.5	8.82	rsmH	BAB1_1458	C	COG0275	18-320 aa hamap:MRAW_MF_01007 S-adenosyl-L-methionine-dependent methyltransferase mraW [mraW]
Q2YLU2	Peptidylprolyl isomerase OS=Brucella abortus (strain 2308) GN=BAB1_1944 PE=4 SV=1 - [Q2YLU2_BRUA2]	35.37	331	36.1	5.19		BAB1_1944	IM	COG0760	17-259 aa pfam_ls:Rotamase PPIC-type PPIASE domain
Q2YLF8	Leu/Ile/Val-binding protein homolog 1 OS=Brucella abortus (strain 2308) GN=BAB1_1794 PE=4 SV=1 - [LIVB1_BRUA2]	35.36	371	39.4	5.21		BAB1_1794	P	COG0683	43-359 aa pfam_fs:ANF_receptor Receptor family ligand binding region
Q2YNP0	DSBA oxidoreductase OS=Brucella abortus (strain 2308) GN=BAB1_0927 PE=4 SV=1 - [Q2YNP0_BRUA2]	35.33	265	28.7	7.01		BAB1_0927	P	COG1651	64-261 aa prf:THIOREDOXIN_2 Thioredoxin domain profile
Q2YQG2	Uncharacterized protein OS=Brucella abortus (strain 2308) GN=BAB1_1283 PE=4 SV=1 - [Q2YQG2_BRUA2]	35.22	159	17.9	6.74		BAB1_1283	IM	COG1430	33-152 aa pfam_fs:DUF192 Uncharacterized ACR, COG1430
Q2YQE3	Periplasmic binding protein/LacI transcriptional regulator OS=Brucella abortus (strain 2308) GN=BAB1_1362 PE=4 SV=1 - [Q2YQE3_BRUA2]	35.14	309	31.8	5.35		BAB1_1362	P	COG1879	25-299 aa pfam_ls:Peripla_BP_1 Periplasmic binding proteins and sugar binding domain of the LacI family
Q2YNL3	Trigger factor OS=Brucella abortus (strain 2308) GN=tig PE=3 SV=1 - [TIG_BRUA2]	35.01	471	52.9	4.85	tig	BAB1_0917	C	COG0544	1-431 aa hamap:TIG_MF_00303 Trigger factor [tig]
Q2YLP1	Uncharacterized protein OS=Brucella abortus (strain 2308) GN=BAB1_1869 PE=4 SV=1 - [Q2YLP1_BRUA2]	34.92	252	27.4	5		BAB1_1869	C
Q2YPJ6	Chaperone XdhC, putative OS=Brucella abortus (strain 2308) GN=BAB1_0380 PE=4 SV=1 - [Q2YPJ6_BRUA2]	34.68	248	26.9	6.31		BAB1_0380	C	COG1975	1-44 aa pfam_fs:XdhC_CoxI XdhC and CoxI family
Q2YMF6	Histone deacetylase family OS=Brucella abortus (strain 2308) GN=BAB1_0456 PE=4 SV=1 - [Q2YMF6_BRUA2]	34.26	337	37.4	5.71		BAB1_0456	C	COG0123	41-335 aa pfam_fs:Hist_deacetyl Histone deacetylase domain
Q2YJS2	Bacterial extracellular solute-binding protein, family 5 OS=Brucella abortus (strain 2308) GN=BAB2_0974 PE=4 SV=1 - [Q2YJS2_BRUA2]	34.25	492	53.7	5.41		BAB2_0974	P	COG0747	68-425 aa pfam_fs:SBP_bac_5 Bacterial extracellular solute-binding proteins, family 5 Middle
Q2YJB6	Putative binding protein BAB2_1146 OS=Brucella abortus (strain 2308) GN=BAB2_1146 PE=4 SV=1 - [Y3646_BRUA2]	34.24	319	34.4	5.62		BAB2_1146	P	COG0715	25-255 aa pfam_ls:OpuAC Substrate binding domain of ABC-type glycine betaine transport system
Q2YP18	Integration host factor subunit beta OS=Brucella abortus (strain 2308) GN=ihfB PE=3 SV=1 - [IHFB_BRUA2]	34.19	94	10.6	9.97	ihfB	BAB1_0152	C	COG0776	1-94 aa hamap:IHFB_MF_00381 Integration host factor subunit beta [ihfB]
Q2YKT4	Periplasmic binding protein OS=Brucella abortus (strain 2308) GN=BAB2_0564 PE=4 SV=1 - [Q2YKT4_BRUA2]	33.98	315	33.7	6.02		BAB2_0564	P	COG4607	53-315 aa prf:FE_B12_PBP Iron siderophore/cobalamin periplasmic-binding domain profile
Q2YP76	Substrate-binding region of ABC-type glycine betaine transport system OS=Brucella abortus (strain 2308) GN=BAB1_0226 PE=4 SV=1 - [Q2YP76_BRUA2]	33.94	304	32.1	5.25		BAB1_0226	IM	COG1732	29-299 aa pfam_fs:OpuAC Substrate binding domain of ABC-type glycine betaine transport system
Q2YMG9	30S ribosomal protein S6 OS=Brucella abortus (strain 2308) GN=rpsF PE=3 SV=1 - [RS6_BRUA2]	33.78	148	17.1	8.03	rpsF	BAB1_0480	C	COG0360	1-95 aa hamap:RS6_MF_00360 30S ribosomal protein S6 [rpsF]
Q2YQJ9	3-hydroxyisobutyrate dehydrogenase OS=Brucella abortus (strain 2308) GN=BAB1_1334 PE=4 SV=1 - [Q2YQJ9_BRUA2]	33.45	296	30.4	5.32		BAB1_1334	C	COG2084	1-161 aa pfam_fs:NAD_binding_2 NAD binding domain of 6-phosphogluconate dehydrogenase
Q2YNV2	Uncharacterized protein OS=Brucella abortus (strain 2308) GN=BAB1_0075 PE=4 SV=1 - [Q2YNV2_BRUA2]	33.33	167	17.8	9.49		BAB1_0075	P
Q2YNM3	Peptidoglycan-binding LysM:Peptidase M23/M37 OS=Brucella abortus (strain 2308) GN=BAB1_0907 PE=4 SV=1 - [Q2YNM3_BRUA2]	33.1	427	43.6	9.8		BAB1_0907	OM	COG0739	198-240 aa pfam_fs:LysM LysM domain
Q2YJ52	Bacterial extracellular solute-binding protein, family 1 OS=Brucella abortus (strain 2308) GN=BAB2_0113 PE=4 SV=1 - [Q2YJ52_BRUA2]	32.97	367	39.1	4.88		BAB2_0113	P	COG1840
Q2YQD1	Periplasmic binding protein OS=Brucella abortus (strain 2308) GN=BAB1_1366 PE=4 SV=1 - [Q2YQD1_BRUA2]	32.97	279	30.4	6.92		BAB1_1366	P	COG0614	34-279 aa prf:FE_B12_PBP Iron siderophore/cobalamin periplasmic-binding domain profile
Q2YL60	ATP-dependent protease La, LON OS=Brucella abortus (strain 2308) GN=BAB2_0344 PE=4 SV=1 - [Q2YL60_BRUA2]	32.76	234	26	4.69		BAB2_0344	C	COG2802	17-219 aa pfam_ls:LON ATP-dependent protease La (LON) domain
Q2YJ26	Modulator of DNA gyrase OS=Brucella abortus (strain 2308) GN=pmbA PE=4 SV=1 - [Q2YJ26_BRUA2]	32.66	447	46.8	5.39	pmbA	BAB2_0205	C	COG0312	27-317 aa pfam_fs:PmbA_TldD Putative modulator of DNA gyrase
Q2YKR5	sn-glycerol-3-phosphate-binding periplasmic protein ugpB OS=Brucella abortus (strain 2308) GN=ugpB PE=4 SV=1 - [UGPB_BRUA2]	32.56	433	47.1	5.4	ugpB	BAB2_0585	P	COG1653	32-338 aa pfam_fs:SBP_bac_1 Bacterial extracellular solute-binding protein
Q2YQA1	Putrescine-binding periplasmic protein OS=Brucella abortus (strain 2308) GN=BAB1_1628 PE=3 SV=1 - [Q2YQA1_BRUA2]	32.43	367	40.9	4.96		BAB1_1628	P	COG0687	36-303 aa pfam_fs:SBP_bac_1 Bacterial extracellular solute-binding protein
Q2YIN7	Molybdenum ABC transporter, periplasmic binding protein OS=Brucella abortus (strain 2308) GN=modA PE=4 SV=1 - [Q2YIN7_BRUA2]	32.27	251	26.7	5.67	modA	BAB2_0087	P*	COG0725	31-236 aa pfam_fs:SBP_bac_1 Bacterial extracellular solute-binding protein
Q2YNS2	Outer membrane efflux protein OS=Brucella abortus (strain 2308) GN=BAB1_0963 PE=4 SV=1 - [Q2YNS2_BRUA2]	32.12	456	48.5	9.16		BAB1_0963	OM	COG1538	34-216 aa pfam_fs:OEP Outer membrane efflux protein
Q2YR99	3-hydroxyacyl-CoA dehydrogenase, C-terminal:3-hydroxyacyl-CoA dehydrogenase, NAD binding domain:3-hydroxyacyl-CoA dehydrogenase OS=Brucella abortus (strain 2308) GN=BAB1_1970 PE=4 SV=1 - [Q2YR99_BRUA2]	31.96	291	31.6	5.73		BAB1_1970	C	COG1250	5-184 aa pfam_fs:3HCDH_N 3-hydroxyacyl-CoA dehydrogenase, NAD binding domain
Q2YLW8	Thiamine-binding periplasmic protein OS=Brucella abortus (strain 2308) GN=thiB PE=4 SV=1 - [THIB_BRUA2]	31.74	334	36.8	6.06	thiB	BAB1_1770	P	COG4143	32-278 aa pfam_ls:SBP_bac_1 Bacterial extracellular solute-binding protein
Q2YIV4	Lipoprotein OS=Brucella abortus (strain 2308) GN=BAB2_0275 PE=3 SV=1 - [Q2YIV4_BRUA2]	31.65	278	30.7	5.44		BAB2_0275	IM	COG1464	42-277 aa pfam_fs:Lipoprotein_9 NLPA lipoprotein
Q2YQ67	Glutamine synthetase OS=Brucella abortus (strain 2308) GN=glnA PE=3 SV=1 - [Q2YQ67_BRUA2]	31.56	469	52.2	5.43	glnA	BAB1_1023	C	COG0174	15-96; 103-383 aa pfam_ls:Gln-synt_N Glutamine synthetase, beta-Grasp domain
Q2YP90	Short-chain dehydrogenase/reductase SDR:Glucose/ribitol dehydrogenase OS=Brucella abortus (strain 2308) GN=BAB1_0246 PE=4 SV=1 - [Q2YP90_BRUA2]	31.56	244	25.6	5.54		BAB1_0246	C	COG1028	10-239 aa pfam_ls:Epimerase NAD dependent epimerase/dehydratase family
Q2YM07	30S ribosomal protein S19 OS=Brucella abortus (strain 2308) GN=rpsS PE=3 SV=1 - [RS19_BRUA2]	31.52	92	10.4	10.16	rpsS	BAB1_1251	C	COG0185	3-83 aa pfam_fs:Ribosomal_S19 Ribosomal protein S19
Q2YQQ5	Bacterial SH3-like region OS=Brucella abortus (strain 2308) GN=BAB1_2177 PE=4 SV=1 - [Q2YQQ5_BRUA2]	31.43	181	19.8	8.64		BAB1_2177	P	COG3807	49-105 aa pfam_fs:SH3_4 Bacterial SH3 domain
Q2YN45	Probable cytosol aminopeptidase OS=Brucella abortus (strain 2308) GN=pepA PE=3 SV=1 - [Q2YN45_BRUA2]	31.39	497	52.5	5.64	pepA	BAB1_0710	C	COG0260	21-144 aa pfam_fs:Peptidase_M17_N Cytosol aminopeptidase family, N-terminal domain
Q2YM65	Beta-lactamase, class A:Penicillin-binding protein, transpeptidase domain:ATP/GTP-binding site motif A (P-loop):Penicillin-bi OS=Brucella abortus (strain 2308) GN=BAB1_1456 PE=4 SV=1 - [Q2YM65_BRUA2]	31.14	607	66.1	9.58		BAB1_1456	IM	COG0768	260-563 aa pfam_fs:Transpeptidase Penicillin binding protein transpeptidase domain
Q2YRA1	30S ribosomal protein S3 OS=Brucella abortus (strain 2308) GN=rpsC PE=3 SV=1 - [RS3_BRUA2]	30.93	236	26.6	9.86	rpsC	BAB1_1249	C	COG0092	1-206 aa hamap:RS3_MF_01309_B 30S ribosomal protein S3 [rpsC]
Q2YNH7	Solute-binding protein/glutamate receptor:Ionotropic glutamate receptor:Bacterial extracellular solute-binding protein, family 3 OS=Brucella abortus (strain 2308) GN=BAB1_0881 PE=3 SV=1 - [Q2YNH7_BRUA2]	30.92	282	30.9	5.2		BAB1_0881	P	COG0834	60-259 aa pre:SBP_GLUR Solute binding protein/glutamate receptor domain
Q2YND8	50S ribosomal protein L13 OS=Brucella abortus (strain 2308) GN=rplM PE=3 SV=1 - [RL13_BRUA2]	30.52	154	17.3	10.18	rplM	BAB1_0811	C	COG0102	1-143 aa hamap:RL13_MF_01366_B 50S ribosomal protein L13 [rplM]
Q2YNE3	Proline--tRNA ligase OS=Brucella abortus (strain 2308) GN=proS PE=3 SV=1 - [SYP_BRUA2]	30.09	442	49.5	5.76	proS	BAB1_0842	C	COG0442	1-440 aa hamap:SYP_MF_01570 Prolyl-tRNA synthetase [proS]
Q2YLE6	ATP synthase subunit beta OS=Brucella abortus (strain 2308) GN=atpD PE=3 SV=1 - [ATPB_BRUA2]	29.56	521	54.8	5.48	atpD	BAB1_1807	IM	COG0055	50-516 aa hamap:ATPB_MF_01347 ATP synthase subunit beta [atpB]
Q2YPV5	Acetyltransferase component of pyruvate dehydrogenase complex OS=Brucella abortus (strain 2308) GN=aceF PE=3 SV=1 - [Q2YPV5_BRUA2]	29.53	447	46.7	5.89	aceF	BAB1_1150	C	COG0508	210-447 aa pfam_ls:2-oxoacid_dh 2-oxoacid dehydrogenases acyltransferase (catalytic domain)
Q2YPZ4	Acyl-CoA dehydrogenase:Acyl-CoA dehydrogenase, C-terminal:Acyl-CoA dehydrogenase, central domain:Acyl-CoA dehydrogenase, N-te OS=Brucella abortus (strain 2308) GN=BAB1_1109 PE=3 SV=1 - [Q2YPZ4_BRUA2]	29.01	394	43.2	5.9		BAB1_1109	C	COG1960	19-131 aa pfam_fs:Acyl-CoA_dh_N Acyl-CoA dehydrogenase, N-terminal domain
Q2YPS2	Bacterial regulatory protein LysR, HTH motif:LysR substrate binding domain OS=Brucella abortus (strain 2308) GN=BAB1_0057 PE=4 SV=1 - [Q2YPS2_BRUA2]	28.96	297	33.2	8.53		BAB1_0057	C	COG0583	6-65 aa pfam_fs:HTH_1 Bacterial regulatory helix-turn-helix protein, lysR family
Q2YMM9	Pyruvate, phosphate dikinase OS=Brucella abortus (strain 2308) GN=ppdK PE=4 SV=1 - [Q2YMM9_BRUA2]	28.86	887	96.3	5.11	ppdK	BAB1_0525	C	COG0574	4-377 aa pfam_fs:PPDK_N Pyruvate phosphate dikinase, PEP/pyruvate binding domain
Q2YM00	Elongation factor G OS=Brucella abortus (strain 2308) GN=fusA PE=3 SV=1 - [EFG_BRUA2]	28.39	694	76.2	5.05	fusA	BAB1_1258	C	COG0480	3-692 aa hamap:EFG_MF_00054_B Elongation factor G [fusA]
Q2YIG8	Bacterial regulatory protein, ArsR family OS=Brucella abortus (strain 2308) GN=BAB2_0334 PE=4 SV=1 - [Q2YIG8_BRUA2]	28.35	102	11.2	6.4		BAB2_0334	C	COG0640	1-102 aa prf:HTH_ARSR_2 ArsR-type HTH domain profile
Q2YLN5	Ubiquinone biosynthesis O-methyltransferase OS=Brucella abortus (strain 2308) GN=ubiG PE=3 SV=1 - [UBIG_BRUA2]	28	248	27.5	5.79	ubiG	BAB1_1875	C	COG2227	8-247 aa hamap:UBIG_MF_00472 3-demethylubiquinone-9 3-methyltransferase [ubiG]
Q2YQL7	Hydrogenobyrinate a,c-diamide synthase OS=Brucella abortus (strain 2308) GN=cobB PE=3 SV=1 - [Q2YQL7_BRUA2]	27.98	436	47	6.41	cobB	BAB1_1316	C	COG1797	1-434 aa hamap:COBB_MF_00027 Cobyrinic acid A,C-diamide synthase [cobB]
Q2YPQ8	Argininosuccinate synthase OS=Brucella abortus (strain 2308) GN=argG PE=3 SV=1 - [ASSY_BRUA2]	27.59	406	45.3	6.06	argG	BAB1_0071	C	COG0137	7-405 aa hamap:ASSY_MF_00005 Argininosuccinate synthase [argG]
Q2YKD2	ABC transporter, transmembrane region:ATP/GTP-binding site motif A (P-loop):ABC transporter:AAA ATPase OS=Brucella abortus (strain 2308) GN=BAB2_0730 PE=4 SV=1 - [Q2YKD2_BRUA2]	27.49	541	57.7	7.85		BAB2_0730	IM	COG4988	1-287 aa prf:ABC_TM1F ABC transporter integral membrane type-1 fused domain profile
Q2YKJ5	Putative binding protein BAB2_0664 OS=Brucella abortus (strain 2308) GN=BAB2_0664 PE=4 SV=1 - [Y3164_BRUA2]	27.32	615	69.5	6.55		BAB2_0664	P	COG4166	171-535 aa pfam_fs:SBP_bac_5 Bacterial extracellular solute-binding proteins, family 5 Middle
Q2YLI1	Probable transaldolase OS=Brucella abortus (strain 2308) GN=tal PE=3 SV=1 - [TAL_BRUA2]	27.19	217	23.4	5.47	tal	BAB1_1813	C	COG0176	1-214 aa hamap:TAL_MF_00494 Probable transaldolase [tal]
Q2YIT4	Putative peptidoglycan binding domain 1 OS=Brucella abortus (strain 2308) GN=BAB2_0069 PE=4 SV=1 - [Q2YIT4_BRUA2]	27.18	412	46.1	9.75		BAB2_0069	IM	COG2951; COG3409	353-409 aa pfam_fs:PG_binding_1 Putative peptidoglycan binding domain
Q2YLY0	Metallopeptidase family M24 OS=Brucella abortus (strain 2308) GN=BAB1_1547 PE=4 SV=1 - [Q2YLY0_BRUA2]	27.15	383	42.7	5.41		BAB1_1547	C	COG0006	13-152 aa pfam_fs:Creatinase_N Creatinase/Prolidase N-terminal domain
Q2YPI3	Esterase/lipase/thioesterase, active site OS=Brucella abortus (strain 2308) GN=BAB1_0358 PE=4 SV=1 - [Q2YPI3_BRUA2]	27.13	413	45.3	9.45		BAB1_0358	IM	COG4782	130-227 aa pre:ESTERASE Esterase/lipase/thioesterase active site serine
Q2YPM9	Nucleoid-associated protein BAB1_0030 OS=Brucella abortus (strain 2308) GN=BAB1_0030 PE=3 SV=1 - [Y030_BRUA2]	27.1	107	11.4	5.11		BAB1_0030	C	COG0718	3-97 aa hamap:YBAB_MF_00274 UPF0133 protein ybaB [ybaB]
Q2YLA0	Adenine nucleotide translocator 1:Basic membrane lipoprotein OS=Brucella abortus (strain 2308) GN=BAB2_0009 PE=4 SV=1 - [Q2YLA0_BRUA2]	26.9	368	39.1	4.82		BAB2_0009	IM	COG1744	33-347 aa pfam_fs:Bmp Basic membrane protein
Q2YNG1	Phosphoribosylaminoimidazole-succinocarboxamide synthase OS=Brucella abortus (strain 2308) GN=purC PE=3 SV=1 - [PUR7_BRUA2]	26.77	254	28.9	5.66	purC	BAB1_0862	C	COG0152	3-238 aa hamap:PUR7_MF_00137 Phosphoribosylaminoimidazole-succinocarboxamide synthase [purC]
Q2YKI4	Ferroxidase OS=Brucella abortus (strain 2308) GN=bfr PE=3 SV=1 - [Q2YKI4_BRUA2]	26.71	161	18.6	4.7	bfr	BAB2_0675	C	COG2193	1-145 aa prf:FERRITIN_LIKE Ferritin-like diiron domain profile
Q2YL64	NAD binding site:Enoyl-CoA hydratase/isomerase:3-hydroxyacyl-CoA dehydrogenase, C-terminal:3-hydroxyacyl-CoA dehydrogenase, N OS=Brucella abortus (strain 2308) GN=BAB2_0444 PE=3 SV=1 - [Q2YL64_BRUA2]	25.75	738	80.2	9.04		BAB2_0444	C	COG1024; COG1250	16-201 aa pfam_fs:ECH Enoyl-CoA hydratase/isomerase family
Q2YMT3	ATP/GTP-binding site motif A (P-loop) OS=Brucella abortus (satrin 2308) GN=BAB1_0609 PE=4 SV=1 - [Q2YMT3_BRUA2]	25.68	380	41.4	6.12		BAB1_0609	C	COG5323	1-366 aa pfam_fs:Terminase_6 Terminase-like family
Q2YQ60	Pyridine nucleotide-disulphide oxidoreductase, class-II:Mercuric reductase:ATP-dependent DNA ligase:Pyridine nucleotide-disulfide OS=Brucella abortus (strain 2308) GN=BAB1_1030 PE=3 SV=1 - [Q2YQ60_BRUA2]	25.65	464	50.7	5.8		BAB1_1030	C	COG1249	172-265 aa pfam_fs:Pyr_redox Pyridine nucleotide-disulphide oxidoreductase
Q2YLE9	Bacterial regulatory protein, MarR family OS=Brucella abortus (strain 2308) GN=BAB1_1804 PE=4 SV=1 - [Q2YLE9_BRUA2]	25.52	191	21.4	9.12		BAB1_1804	C	COG1846	80-149 aa pfam_fs:MarR MarR family
Q2YJ30	Pseudouridine synthase OS=Brucella abortus (strain 2308) GN=BAB2_0198 PE=4 SV=1 - [Q2YJ30_BRUA2]	25.42	581	64	10.35		BAB2_0198	C	COG1187	134-217 aa pfam_fs:PseudoU_synth_2 RNA pseudouridylate synthase
Q2YRX6	ATP/GTP-binding site motif A (P-loop):ABC transporter:AAA ATPase OS=Brucella abortus (strain 2308) GN=BAB1_1597 PE=3 SV=1 - [Q2YRX6_BRUA2]	24.92	329	36.9	9.63		BAB1_1597	IM	COG0444	6-256 aa prf:ABC_TRANSPORTER_2 ATP-binding cassette, ABC transporter-type domain profile
Q2YM98	GTPase Der OS=Brucella abortus (strain 2308) GN=der PE=3 SV=1 - [DER_BRUA2]	24.84	483	53.3	6.6	der	BAB1_0405	C	COG1160	2-472 aa hamap:ENGA_MF_00195 GTP-binding protein engA [engA]
Q2YQH9	Heat resistant agglutinin 1 OS=Brucella abortus (strain 2308) GN=BAB1_1701 PE=4 SV=1 - [Q2YQH9_BRUA2]	24.82	274	29.2	4.89		BAB1_1701	OM	COG3637	1-256 aa pfam_ls:Surface_Ag_2 Surface antigen
Q2YL51	3-isopropylmalate dehydratase small subunit OS=Brucella abortus (strain 2308) GN=leuD PE=3 SV=1 - [LEUD_BRUA2]	24.38	201	22.2	5.01	leuD	BAB2_0353	C	COG0066	1-201 aa hamap:LEUD_MF_01031 3-isopropylmalate dehydratase small subunit [leuD]
Q2YQT2	Ferritin:DNA-binding protein Dps OS=Brucella abortus (strain 2308) GN=BAB1_2150 PE=3 SV=1 - [Q2YQT2_BRUA2]	24.38	165	18.3	5.25		BAB1_2150	C	COG0783	22-162 aa pfam_fs:Ferritin Ferritin-like domain
Q2YM13	50S ribosomal protein L10 OS=Brucella abortus (strain 2308) GN=rplJ PE=3 SV=1 - [RL10_BRUA2]	24.24	172	17.9	9.6	rplJ	BAB1_1266	C	COG0244	1-158 aa hamap:RL10_MF_00362 50S ribosomal protein L10 [rplJ]
Q2YLP3	ErfK/YbiS/YcfS/YnhG OS=Brucella abortus (strain 2308) GN=BAB1_1867 PE=4 SV=1 - [Q2YLP3_BRUA2]	24.23	408	43.6	5.45		BAB1_1867	C	COG1376	273-406 aa pfam_ls:YkuD Ykud domain
Q2YP52	Uncharacterized protein OS=Brucella abortus (strain 2308) GN=BAB1_0187 PE=4 SV=1 - [Q2YP52_BRUA2]	24	129	15.7	10.12		BAB1_0187	OM		95-125 aa pfam_fs:BA14K BA14K-like protein
Q2YKH4	Preprotein translocase subunit-like protein OS=Brucella abortus (strain 2308) GN=BAB2_0685 PE=4 SV=1 - [Q2YKH4_BRUA2]	24	201	22.2	5.34		BAB2_0685	IM
Q2YLZ5	DNA repair protein RecN OS=Brucella abortus (strain 2308) GN=recN PE=3 SV=1 - [Q2YLZ5_BRUA2]	23.87	559	60.6	5.21	recN	BAB1_1440	C	COG0497	6-517 aa pfam_ls:SMC_N RecF/RecN/SMC N terminal domain
Q2YPN4	30S ribosomal protein S1 OS=Brucella abortus (strain 2308) GN=rpsA PE=3 SV=1 - [Q2YPN4_BRUA]	23.85	566	62.6	5.19	rpsA	BAB1_0025	C	COG0539	194-266 aa pfam_fs:S1 S1 RNA binding domain
Q2YKZ6	Helix-turn-helix protein RpiR:Bacterial regulatory protein LacI, HTH motif:Sugar isomerase (SIS) OS=Brucella abortus (strain 2308) GN=BAB2_0494 PE=4 SV=1 - [Q2YKZ6_BRUA2]	23.02	305	32.5	7.69		BAB2_0494	C	COG1737	17-93 aa prf:HTH_RPIR RpiR-type HTH domain profile
Q2YQH6	tRNA(Ile)-lysidine synthase OS=Brucella abortus (strain 2308) GN=tilS PE=3 SV=1 - [TILS_BRUA2]	22.99	448	48.6	7.7	tilS	BAB1_1704	C	COG0037	14-312 aa hamap:TILS_MF_01161 tRNA(Ile)-lysidine synthase [tilS]
Q2YQT5	Lipoprotein, putative OS=Brucella abortus (strain 2308) GN=BAB1_2147 PE=4 SV=1 - [Q2YQT5_BRUA2]	22.85	326	34.9	9.32		BAB1_2147	P	COG3773	74-175 aa pfam_fs:Hydrolase_2 Cell Wall Hydrolase
Q2YLV1	Uncharacterized protein OS=Brucella abortus (strain 2308) GN=BAB1_1933 PE=3 SV=1 - [Q2YLV1_BRUA2]	22.57	427	47.3	6.41		BAB1_1933	C	COG0621	144-317 aa pfam_fs:Radical_SAM Radical SAM superfamily
Q2YML3	Ribosomal protein S7 OS=Brucella abortus (strain 2308) GN=BAB1_0505 PE=4 SV=1 - [Q2YML3_BRUA2]	22.56	266	28.2	5.21		BAB1_0505	P*	COG4233	110-136 aa pat:RIBOSOMAL_S7 Ribosomal protein S7 signature
Q2YK29	Inosine-5'-monophosphate dehydrogenase OS=Brucella abortus (strain 2308) GN=guaB PE=3 SV=1 - [Q2YK29_BRUA2]	22.54	497	52.3	6.89	guaB	BAB2_0851	C	COG0516; COG0517	96-214 aa pfam_fs:CBS CBS domain pair 12-482 aa pfam_fs:IMPDH IMP dehydrogenase / GMP reductase domain
Q2YKE3	ATP/GTP-binding site motif A (P-loop):ABC transporter:AAA ATPase OS=Brucella abortus (strain 2308) GN=BAB2_0717 PE=4 SV=1 - [Q2YKE3_BRUA2]	22.52	333	36.4	6.33		BAB2_0717	IM	COG3839	4-234 aa prf:ABC_TRANSPORTER_2 ATP-binding cassette, ABC transporter-type domain profile
Q2YNI7	Bacterial lipid A biosynthesis acyltransferase OS=Brucella abortus (strain 2308) GN=BMI_I848 PE=4 SV=1 - [Q2YNI7_BRUA2]	22.4	308	35.5	9.74		BAB1_0870	C	COG1560	35-307 aa pfam_fs:Lip_A_acyltrans Bacterial lipid A biosynthesis acyltransferase
Q2YME2	Glycyl-tRNA synthetase OS=Brucella abortus (strain 2308) GN=glyS PE=3 SV=1 - [Q2YME2_BRUA2]	22.39	777	85.4	5.36	glyS	BAB1_0433	C	COG0751	1-775 aa hamap:SYGB_MF_00255 Glycyl-tRNA synthetase beta subunit [glyS]
Q2YQD3	ATP-dependent DNA ligase OS=Brucella abortus (strain 2308) GN=BAB1_1384 PE=4 SV=1 - [Q2YQD3_BRUA2]	22.22	252	28.1	5.28		BAB1_1384	P*	COG5266	18-226 aa pfam_fs:NikM Nickel uptake substrate-specific transmembrane region
Q2YMP3	GDP-mannose 4,6-dehydratase OS=Brucella abortus (strain 2308) GN=gmd PE=3 SV=1 - [Q2YMP3_BRUA2]	22.1	362	41.1	5.98	gmd	BAB1_0545	C	COG1089	5-252 aa pfam_fs:Epimerase NAD dependent epimerase/dehydratase family
Q2YLB9	Leu/Ile/Val-binding protein family OS=Brucella abortus (strain 2308) GN=BAB2_0282 PE=4 SV=1 - [Q2YLB9_BRUA2]	21.95	401	43.1	5.23		BAB2_0282	P*	COG0683
Q2YPX3	Lon protease OS=Brucella abortus (strain 2308) GN=lon PE=3 SV=1 - [LON_BRUA2]	21.8	812	89.9	5.99	lon	BAB1_1130	C	COG0466	686-694 aa pat:LON_SER ATP-dependent serine proteases, lon family, serine active site
Q2YIF5	Inositol phosphatase/fructose-1,6-bisphosphatase:Inositol monophosphatase OS=Brucella abortus (strain 2308) GN=BAB2_0044 PE=4 SV=1 - [Q2YIF5_BRUA2]	21.71	258	27.7	4.88		BAB2_0044	C	COG0483	4-257 aa pfam_ls:Inositol_P Inositol monophosphatase family
Q2YJG9	Uncharacterized protein OS=Brucella abortus (strain 2308) GN=BAB2_1085 PE=4 SV=1 - [Q2YJG9_BRUA2]	21.52	158	17.5	5.19		BAB2_1085	C
Q2YRJ7	Glycerophosphoryl diester phosphodiesterase OS=Brucella abirtus (strain 2308) GN=BAB1_1188 PE=4 SV=1 - [Q2YRJ7_BRUA2]	21.14	246	27.2	5.82		BAB1_1188	C	COG0584	19-232 aa pfam_fs:GDPD Glycerophosphoryl diester phosphodiesterase family
Q2YMX6	Probable periplasmic serine endoprotease DegP-like OS=Brucella abortus (strain 2308) GN=htrA PE=4 SV=1 - [DEGPL_BRUA2]	21.05	513	53.5	5.79	htrA	BAB1_0635	P	COG0265	300-498 aa pfam_fs:PDZ PDZ domain (Also known as DHR or GLGF)
Q2YK73	Lipopolysaccharide biosynthesis OS=Brucella abortus (strain 2308) GN=BAB2_0805 PE=4 SV=1 - [Q2YK73_BRUA2]	20.71	729	79	9.25		BAB2_0805	IM	COG3206	15-186 aa pfam_ls:Wzz Chain length determinant protein
Q2YR10	Uncharacterized protein OS=Brucella abortus (strain 2308) GN=BAB1_2064 PE=4 SV=1 - [Q2YR10_BRUA2]	20.27	666	74.5	5.23		BAB1_2064	C	COG1331	7-76 aapfam_ls:DUF255 Protein of unknown function, DUF255
Q2YPL6	Bacterial extracellular solute-binding protein, family 5 OS=Brucella abortus (strain 2308) GN=BAB1_0010 PE=4 SV=1 - [Q2YPL6_BRUA2]	20.26	622	70.7	5.85		BAB1_0010	P	COG4166	108-527 aa pfam_ls:SBP_bac_5 Bacterial extracellular solute-binding proteins, family 5 Middle
Q2YJF6	Flagellar hook-length control protein OS=Brucella abortus (strain 2308) GN=BAB2_1101 PE=4 SV=1 - [Q2YJF6_BRUA2]	20.15	420	42.4	5.49		BAB2_1101	OM		184-323 aa pfam_ls:Flg_hook Flagellar hook-length control protein
	*membrane-bound protein
	C: cytoplasmic protein
	EC: extracellular protein
	P: periplasmic protein
	OM: outer membrane
	IM: inner membrane
