# Supplementary material for: Proteomic Analysis of Membrane Blebs of Brucella abortus 2308 and RB51 and Their Evaluation as an Acellular Vaccine
Source: Front Microbiol. 2019 Nov 29;10:2714. doi: 10.3389/fmicb.2019.02714 (PMC6895012; doi:10.3389/fmicb.2019.02714)
Supplement: TABLE S2 — Annotation of identified proteins of membrane blebs from B. abortus RB51 by LC-MS/MS. [file Table_2.xlsx]

## Sheet: Hoja1
	Table 2S. Annotation of identified proteins of membrane blebs from B. abortus RB51 by LC-MS/MS
Accession	Description	ΣCoverage	#AA	MW [kDa]	calc. pI	Gene	Locus Tag	Subcellular location	COG/GO annotation	motif scan
ENT72578.1	hypothetical protein D803_00448 [Brucella abortus RB51-AHVLA]	46.86	208	27.78	6.72		D803_00448	P*	COG5342	74-208 aa pfam_ls:IalB Invasion associated locus B (IalB) protein
ENT71271.1	hypothetical protein D803_03149 [Brucella abortus RB51-AHVLA]	31.74	397	44.47	9.15	repC	D803_03149	C		2-394 aa pfam_fs:RP-C Replication protein C
ENT70698.1	6,7-dimethyl-8-ribityllumazine synthase 2 [Brucella abortus RB51-AHVLA]	28.48	158	17.35	6.59	ribH	D803_02562	C	COG0054	8-154 aa pfam_ls:DMRL_synthase 6,7-dimethyl-8-ribityllumazine synthase
ENT70334.1	hypothetical protein D803_02196 [Brucella abortus RB51-AHVLA]	57.25	138	14.78	9.3		D803_02196	IM	COG4893	15-138 aa pfam_fs:DUF2195 Uncharacterized protein conserved in bacteria (DUF2195)
ENT73778.1	hypothetical protein D803_01680 [Brucella abortus RB51-AHVLA]	27.22	371	39.39	5.21		D803_01680	P*	COG0683	43-359 aa pfam_fs:ANF_receptor Receptor family ligand binding region
ENT73789.1	ATP synthase subunit beta [Brucella abortus RB51-AHVLA]	21.11	521	54.79	5.48	atpD	D803_01691	IM	COG0055	50-516 aa hamap:ATPB_MF_01347 ATP synthase subunit beta [atpB]
ENT73503.1	hypothetical protein D803_01394 [Brucella abortus RB51-AHVLA]	41.55	284	31.86	5.16		D803_01394	OM
ENT73305.1	50S ribosomal protein L11 [Brucella abortus RB51-AHVLA]	56.34	142	15.01	9.81	rplK	D803_01190	P*	COG0080	1-141 aa hamap:RL11_MF_00736_B 50S ribosomal protein L11 [rplK]
ENT72555.1	hypothetical protein D803_00425 [Brucella abortus RB51-AHVLA]	90.08	121	12.87	5.04		D803_00425	P	COG3895	45-118 aa pfam_fs:DUF2091 Predicted periplasmic protein (DUF2091)
ENT70793.1	hypothetical protein D803_02659 [Brucella abortus RB51-AHVLA]	25.73	166	18.72	10.08		D803_02659	EC		133-166 aa pfam_ls:BA14K BA14K-like protein
ENT72597.1	hypothetical protein D803_00467 [Brucella abortus RB51-AHVLA]	59.2	192	20.77	9.11		D803_00467	EC
ENT70490.1	hypothetical protein D803_02352 [Brucella abortus RB51-AHVLA]	48.8	255	28.47	8.92		D803_02352	C	COG2188	24-87 aa pfam_ls:GntR Bacterial regulatory proteins, gntR family
ENT70416.1	sulfoxide reductase catalytic subunit yedY [Brucella abortus RB51-AHVLA]	28.53	319	35.41	8.44	msrP	D803_02278	P*	COG2041	78-254 aa pfam_fs:Oxidored_molyb Oxidoreductase molybdopterin binding domain
ENT73279.1	30S ribosomal protein S8 [Brucella abortus RB51-AHVLA]	43.18	132	14.61	9.62	rpsH	D803_01164	C	COG0096	2-132 aa hamap:RS8_MF_01302_B 30S ribosomal protein S8 [rpsH]
ENT73099.1	hypothetical protein D803_00981 [Brucella abortus RB51-AHVLA]	26.7	206	23.8	9.96		D803_00981	C	COG5661	7-194 aa pfam_fs:DUF922 Bacterial protein of unknown function (DUF922)
ENT70699.1	hypothetical protein D803_02563 [Brucella abortus RB51-AHVLA]	44.42	421	45.14	5.16		D803_02563	P	COG1653	39-320 aa pfam_fs:SBP_bac_1 Bacterial extracellular solute-binding protein
ENT70710.1	hypothetical protein D803_02574 [Brucella abortus RB51-AHVLA]	47.86	257	27.75	8.45		D803_02574	P	COG0834	46-237 aa pre:SBP_GLUR Solute binding protein/glutamate receptor domain
ENT74111.1	hypothetical protein D803_02023 [Brucella abortus RB51-AHVLA]	77.42	93	10.66	9.37		D803_02023	P
ENT72519.1	hypothetical protein D803_00389 [Brucella abortus RB51-AHVLA]	32.69	621	69.31	6.22		D803_00389	OM	COG0457	61-526 aa pfam_ls:TPR_1 Tetratricopeptide repeat
ENT74131.1	30S ribosomal protein S15 [Brucella abortus RB51-AHVLA]	42.7	89	10.2	10.32	rpsO	D803_02043	C	COG0184	3-89 aa hamap:RS15_MF_01343_B 30S ribosomal protein S15 [rpsO]
ENT72856.1	hypothetical protein D803_00730 [Brucella abortus RB51-AHVLA]	28	433	48.19	9.09		D803_00730	P	COG2989	115-173 aa pfam_ls:PG_binding_1 Putative peptidoglycan binding domain
ENT73335.1	hypothetical protein D803_01225 [Brucella abortus RB51-AHVLA]	63.68	212	22.19	9.02	omp3b	D803_01225	OM	COG3637
ENT72864.1	hypothetical protein D803_00738 [Brucella abortus RB51-AHVLA]	43.46	168	18.19	9.41		D803_00738	OM	COG2913	30-121 aa pfam_ls:SmpA_OmlA SmpA / OmlA family
ENT73616.1	hypothetical protein D803_01508 [Brucella abortus RB51-AHVLA]	50	198	21.22	7.85		D803_01508	IM	COG5400	38-198 aa pfam_fs:DUF1134 Protein of unknown function (DUF1134)
ENT73319.1	hypothetical protein D803_01207 [Brucella abortus RB51-AHVLA]	62.89	159	17.93	6.74		D803_01207	IM	COG1430	33-152 aa pfam_fs:DUF192 Uncharacterized ACR, COG1430
ENT73770.1	monofunctional biosynthetic peptidoglycan transglycosylase [Brucella abortus RB51-AHVLA]	22.88	242	26.69	10.08		D803_01672	IM	COG0744	20-237 aa hamap:MTGA_MF_00766 Monofunctional biosynthetic peptidoglycan transglycosylase [mtgA]
ENT73942.1	electron transfer flavoprotein subunit alpha [Brucella abortus RB51-AHVLA]	24.64	309	31.68	4.75		D803_01852	IM	COG2025	18-273 aa pfam_fs:ETF_alpha Electron transfer flavoprotein FAD-binding domain
ENT71293.1	hypothetical protein D803_03171 [Brucella abortus RB51-AHVLA]	22.36	416	44.32	5.96		D803_03171	P	COG0683
ENT73776.1	hypothetical protein D803_01678 [Brucella abortus RB51-AHVLA]	42.77	371	39.59	5.24		D803_01678	P*	COG0683	43-359 aa pfam_fs:ANF_receptor Receptor family ligand binding region
ENT73795.1	fructose-6-phosphate aldolase [Brucella abortus RB51-AHVLA]	43.78	217	23.35	5.47	tal	D803_01697	C	COG0176	1-214 aa hamap:TAL_MF_00494 Probable transaldolase [tal]
ENT73452.1	hypothetical protein D803_01343 [Brucella abortus RB51-AHVLA]	40.87	165	18.02	8.87		D803_01343	P*	COG3045	17-157 aa pfam_ls:CreA CreA protein
ENT70445.1	YaeC family lipoprotein [Brucella abortus RB51-AHVLA]	44.24	278	30.66	5.44		D803_02307	P	COG1464	42-277 aa pfam_fs:Lipoprotein_9 NLPA lipoprotein
ENT70367.1	hypothetical protein D803_02229 [Brucella abortus RB51-AHVLA]	52.02	223	24.35	9.61		D803_02229	P
ENT73303.1	50S ribosomal protein L10 [Brucella abortus RB51-AHVLA]	25.58	172	17.94	9.6	rplJ	D803_01188	C	COG0244	1-158 aa hamap:RL10_MF_00362 50S ribosomal protein L10 [rplJ]
ENT73394.1	TonB-dependent vitamin B12 receptor [Brucella abortus RB51-AHVLA]	28.69	620	66.88	5.26		D803_01285	OM	COG4206	48-155 aa pfam_fs:Plug TonB-dependent Receptor Plug Domain
ENT74087.1	50S ribosomal protein L20 [Brucella abortus RB51-AHVLA]	50	134	15.09	11.01	rplT	D803_01999	C	COG0292	2-115 aa hamap:RL20_MF_00382 50S ribosomal protein L20 [rplT]
ENT70968.1	UPF0423 protein [Brucella abortus RB51-AHVLA]	36.81	182	19.89	6.06		D803_02836	P	COG3470	22-175 aa pfam_fs:Iron_transport Fe2+ transport protein
ENT72737.1	hypothetical protein D803_00608 [Brucella abortus RB51-AHVLA]	63.46	216	22.06	9.39	omp31-1	D803_00608	P		8-112 aa prf:ALA_RICH Alanine-rich region profile
ENT73306.1	transcription termination/antitermination factor NusG [Brucella abortus RB51-AHVLA]	42.86	175	19.66	6.64	nusG	D803_01191	C	COG0250	3-100 aa pfam_ls:NusG Transcription termination factor nusG
ENT72501.1	hypothetical protein D803_00371 [Brucella abortus RB51-AHVLA]	23.74	438	48.51	4.97	hsp70	D803_00371	IM	COG0443	386-400 aa pat:HSP70_3 Heat shock hsp70 proteins family signature 3
ENT73282.1	50S ribosomal protein L24 [Brucella abortus RB51-AHVLA]	62.14	103	11.2	10.24	rplX	D803_01167	C	COG0198	2-95 aa hamap:RL24_MF_01326_B 50S ribosomal protein L24 [rplX]
ENT72742.1	porin omp2b [Brucella abortus RB51-AHVLA]	58.06	362	38.72	4.58	omp2b	D803_00614	OM		1-355 aa pfam_fs:Porin_2 Porin subfamily
ENT73297.1	30S ribosomal protein S7 [Brucella abortus RB51-AHVLA]	44.16	156	17.62	10.17	rpsG	D803_01182	C	COG0049	1-156 aa hamap:RS7_MF_00480_B 30S ribosomal protein S7 [rpsG]
ENT71260.1	hypothetical protein D803_03138 [Brucella abortus RB51-AHVLA]	33.25	406	44.18	5.64		D803_03138	P	COG0683	51-380 aa pfam_ls:ANF_receptor Receptor family ligand binding region
ENT72994.1	1A family penicillin-binding protein [Brucella abortus RB51-AHVLA]	19.29	819	89.61	8.55		D803_00872	OM	COG5009	441-734 aa pfam_fs:Transpeptidase Penicillin binding protein transpeptidase domain
ENT73229.1	hypothetical protein D803_01114 [Brucella abortus RB51-AHVLA]	21.97	280	31.33	6.23		D803_01114	P		23-272 aa pfam_ls:DUF1849 Domain of unknown function (DUF1849)
ENT70242.1	type IV secretion system protein virB4 [Brucella abortus RB51-AHVLA]	22.86	831	94.57	6.38	virB4	D803_02104	OM	COG3451	184-388 aa pfam_fs:CagE_TrbE_VirB CagE, TrbE, VirB family, component of type IV transporter system
ENT73907.1	outer membrane lipoprotein omp19 [Brucella abortus RB51-AHVLA]	47.46	177	17.6	8.91	omp19	D803_01816	OM		1-177 aa pfam_fs:OMP_19 Bacterial outer membrane lipoprotein omp19
ENT73844.1	hypothetical protein D803_01747 [Brucella abortus RB51-AHVLA]	21.5	479	53.65	5.83		D803_01747	C
ENT72881.1	50S ribosomal protein L13 [Brucella abortus RB51-AHVLA]	30.52	154	17.03	10.18	rplM	D803_00756	C	COG0102	1-143 aa hamap:RL13_MF_01366_B 50S ribosomal protein L13 [rplM]
ENT70685.1	alkyl hydroperoxide reductase AhpD [Brucella abortus RB51-AHVLA]	41.71	175	18.78	6.11	ahpD	D803_02549	C	COG2128	1-175 aa hamap:AHPD_MF_01676 Alkyl hydroperoxide reductase ahpD [ahpD]
ENT70349.1	hypothetical protein D803_02211 [Brucella abortus RB51-AHVLA]	23.41	410	44.07	6.61		D803_02211	C	COG0277	185-403 aa pfam_ls:FAD-oxidase_C FAD linked oxidases, C-terminal domain
ENT70576.1	hypothetical protein D803_02440 [Brucella abortus RB51-AHVLA]	26.26	913	99.49	6.05		D803_02440	C	COG0790; COG3409	852-908 aa pfam_ls:PG_binding_1 Putative peptidoglycan binding domain
ENT70805.1	hypothetical protein D803_02672 [Brucella abortus RB51-AHVLA]	80.98	205	20.06	9.13		D803_02672	OM	COG5342	33-165 aa pfam_fs:IalB Invasion associated locus B (IalB) protein
ENT72569.1	30S ribosomal protein S6 [Brucella abortus RB51-AHVLA]	29.05	148	17.09	8.03	rpsF	D803_00439	C	COG0360	1-95 aa hamap:RS6_MF_00360 30S ribosomal protein S6 [rpsF]
ENT72741.1	porin omp2a [Brucella abortus RB51-AHVLA]	27.52	321	34.53	4.56	omp2a	D803_00612	OM		1-314 aa pfam_fs:Porin_2 Porin subfamily
ENT73082.1	hypothetical protein D803_00964 [Brucella abortus RB51-AHVLA]	67.42	178	18.89	7.97		D803_00964	P	COG3184	64-159 aa pfam_fs:DUF2059 Uncharacterized protein conserved in bacteria (DUF2059)
ENT73164.1	hypothetical protein D803_01049 [Brucella abortus RB51-AHVLA]	73.98	196	20.75	7.88		D803_01049	C	COG0652	32-192 aa pfam_ls:Pro_isomerase Cyclophilin type peptidyl-prolyl cis-trans isomerase/CLD
ENT70542.1	hypothetical protein D803_02405 [Brucella abortus RB51-AHVLA]	68.25	315	33.23	5.11		D803_02405	P	COG1879	26-307 aa pfam_ls:Peripla_BP_1 Periplasmic binding proteins and sugar binding domain of the LacI family
ENT70288.1	hypothetical protein D803_02150 [Brucella abortus RB51-AHVLA]	24.8	367	39.09	4.88		D803_02150	P	COG1840
ENT72970.1	hypothetical protein D803_00847 [Brucella abortus RB51-AHVLA]	44.26	432	44.2	9.66		D803_00847	EC	COG0739	203-245 aa pfam_ls:LysM LysM domain
ENT72182.1	hypothetical protein D803_00048 [Brucella abortus RB51-AHVLA]	59.8	200	21.36	9.28		D803_00048	P
ENT72832.1	hypothetical protein D803_00706 [Brucella abortus RB51-AHVLA]	68.29	82	8.28	10.5		D803_00706	EC		27-64 aa prf:GLY_RICH Glycine-rich region profile
ENT73904.1	succinyl-CoA ligase [ADP-forming] subunit beta [Brucella abortus RB51-AHVLA]	26.33	398	42.52	4.9	sucC	D803_01813	C	COG0045	1-396 aa hamap:SUCC_MF_00558 Succinyl-CoA ligase [ADP-forming] subunit beta [sucC]
ENT70396.1	hypothetical protein D803_02258 [Brucella abortus RB51-AHVLA]	38.17	131	14.36	9.58		D803_02258	P	COG5591
ENT72980.1	trigger factor [Brucella abortus RB51-AHVLA]	29.56	471	52.93	4.85	tig	D803_00858	C	COG0544	1-431 aa hamap:TIG_MF_00303 Trigger factor [tig]
ENT73255.1	TAXI family TRAP transporter solute receptor [Brucella abortus RB51-AHVLA]	31.5	329	34.27	6.92		D803_01140	OM	COG2358
ENT73755.1	hypothetical protein D803_01657 [Brucella abortus RB51-AHVLA]	52.13	94	9.31	9.57		D803_01657	OM		28-72 aa pfam_ls:Rick_17kDa_Anti Rickettsia 17 kDa surface antigen
ENT73220.1	outer membrane protein assembly complex, YaeT protein [Brucella abortus RB51-AHVLA]	21.23	782	85.9	5.37	bamA	D803_01105	OM	COG4775	36-433 aa pfam_ls:Surf_Ag_VNR Surface antigen variable number repeat
ENT73285.1	50S ribosomal protein L29 [Brucella abortus RB51-AHVLA]	36.36	66	7.51	10.54	rpmC	D803_01170	C	COG0255	1-62 aa hamap:RL29_MF_00374_B 50S ribosomal protein L29 [rpmC]
ENT73675.1	hypothetical protein D803_01577 [Brucella abortus RB51-AHVLA]	44.25	117	12.74	5.11		D803_01577	EC		25-117 aa pfam_fs:DUF883 Bacterial protein of unknown function (DUF883)
ENT73176.1	DNA-binding protein HRL18 [Brucella abortus RB51-AHVLA]	100	91	9.07	9.77		D803_01061	C	COG0776	1-90 aa pfam_ls:Bac_DNA_binding Bacterial DNA-binding protein
ENT73796.1	hypothetical protein D803_01698 [Brucella abortus RB51-AHVLA]	32.64	193	20.2	9.26		D803_01698	P*	COG5468	60-187 aa pfam_fs:DUF2159 Predicted secreted (periplasmic) protein (DUF2159)
ENT70499.1	hypothetical protein D803_02361 [Brucella abortus RB51-AHVLA]	22.82	215	23.27	8.66		D803_02361	C		94-167 aa pfam_ls:S1 S1 RNA binding domain
ENT72806.1	hypothetical protein D803_00678 [Brucella abortus RB51-AHVLA]	91.98	174	17.65	10.29		D803_00678	P		25-171 aa pfam_fs:DUF992 Protein of unknown function (DUF992)
ENT74113.1	DNA protection during starvation protein [Brucella abortus RB51-AHVLA]	38.13	165	18.25	5.25		D803_02025	C	COG0783	22-165 aa pfam_ls:Ferritin Ferritin-like domain
ENT73544.1	hypothetical protein D803_01436 [Brucella abortus RB51-AHVLA]	35.48	170	18.83	9.95		D803_01436	OM		138-168 aa pfam_ls:BA14K BA14K-like protein
ENT70838.1	hypothetical protein D803_02706 [Brucella abortus RB51-AHVLA]	36.98	525	58.6	5.2		D803_02706	P	COG4166	71-488 pfam_fs:SBP_bac_5 Bacterial extracellular solute-binding proteins, family 5 Middle
ENT70253.1	outer membrane lipoprotein omp10 [Brucella abortus RB51-AHVLA]	35.88	126	13.26	9.02	omp10	D803_02115	OM
ENT73292.1	50S ribosomal protein L4 [Brucella abortus RB51-AHVLA]	58.25	206	22.56	10.12	rplD	D803_01177	C	COG0088	8-206 aa hamap:RL4_MF_01328_B 50S ribosomal protein L4 [rplD]
ENT73022.1	hypothetical protein D803_00901 [Brucella abortus RB51-AHVLA]	54	100	10.64	9.15		D803_00901	OM
ENT73094.1	hypothetical protein D803_00976 [Brucella abortus RB51-AHVLA]	43	209	22.58	9.65		D803_00976	OM	COG3218	24-202 aa pfam_fs:DUF330 Protein of unknown function (DUF330)
ENT72668.1	hypothetical protein D803_00539 [Brucella abortus RB51-AHVLA]	91.67	120	12.05	4.61		D803_00539	IM
ENT73276.1	30S ribosomal protein S5 [Brucella abortus RB51-AHVLA]	35.75	186	20.46	10.49	rpsE	D803_01161	C	COG0098	1-173 aa hamap:RS5_MF_01307_B 30S ribosomal protein S5 [rpsE]
ENT73897.1	dihydrolipoyl dehydrogenase [Brucella abortus RB51-AHVLA]	29.87	461	49.06	6		D803_02719	C	COG1249	4-320 aa pfam_fs:Pyr_redox_2 Pyridine nucleotide-disulphide oxidoreductase
ENT72712.1	hypothetical protein D803_00583 [Brucella abortus RB51-AHVLA]	48	150	15.47	9.22		D803_00583	P*	COG4520
ENT70850.1	hypothetical protein D803_02718 [Brucella abortus RB51-AHVLA]	38.74	261	29.17	7.91		D803_02718	IM	COG3346	29-259 aa prf:SURF1 SURF1 family profile
ENT70441.1	hypothetical protein D803_02303 [Brucella abortus RB51-AHVLA]	32.16	295	32.1	7.75		D803_02303	OM	COG0457	80-283 aa pfam_ls:TPR_2 Tetratricopeptide repeat
ENT72733.1	hypothetical protein D803_00604 [Brucella abortus RB51-AHVLA]	44.86	115	11.86	9.28		D803_00604	P*	COG4731	27-114 aa pfam_ls:DUF2147 Uncharacterized protein conserved in bacteria (DUF2147)
ENT73294.1	30S ribosomal protein S10 [Brucella abortus RB51-AHVLA]	35.29	102	11.62	10.18	rpsJ	D803_01179	C	COG0051	3-102 aa hamap:RS10_MF_00508 30S ribosomal protein S10 [rpsJ]
ENT72669.1	hypothetical protein D803_00540 [Brucella abortus RB51-AHVLA]	24.06	503	54.1	5.68		D803_00540	C	COG0433	11-503 aa pfam_ls:DUF853 Bacterial protein of unknown function (DUF853)
ENT72927.1	phosphoribosylformylglycinamidine synthase, purS protein [Brucella abortus RB51-AHVLA]	71.25	80	8.37	5.27	purS	D803_00804	C	COG1828	2-80 aa pfam_ls:PurS Phosphoribosylformylglycinamidine (FGAM) synthase
ENT73760.1	hypothetical protein D803_01662 [Brucella abortus RB51-AHVLA]	35.5	493	52.73	9.49		D803_01662	OM	COG4784	91-270 aa pfam_fs:Peptidase_M48 Peptidase family M48
ENT70986.1	chaperone-like protein hdeA [Brucella abortus RB51-AHVLA]	26.32	114	12.33	6.59	hdeA	D803_02854	P*		36-114 aa pfam_fs:HdeA hns-dependent expression protein A (HdeA)
ENT72238.1	acid tolerance regulatory protein ActR [Brucella abortus RB51-AHVLA]	50.27	187	20.78	6.19		D803_00104	C	COG4567	18-128 aa pfam_fs:Response_reg Response regulator receiver domain
ENT70920.1	acetyl-CoA C-acetyltransferase [Brucella abortus RB51-AHVLA]	35.61	399	41.21	5.95		D803_02788	C	COG0183	4-265 aa pfam_fs:Thiolase_N Thiolase, N-terminal domain
ENT70474.1	histidine ammonia-lyase [Brucella abortus RB51-AHVLA]	26.81	511	53.25	6.1	hutH	D803_02336	C	COG2986	2-503 aa hamap:HUTH_MF_00229 Histidine ammonia-lyase [hutH]
ENT70816.1	bacterioferritin [Brucella abortus RB51-AHVLA]	26.71	161	18.56	4.7	bfr	D803_02683	C	COG2193	8-144 aa pfam_ls:Ferritin Ferritin-like domain
ENT73934.1	hypothetical protein D803_01844 [Brucella abortus RB51-AHVLA]	42.29	227	26.4	6.62		D803_01844	C	COG1802	17-79 aa pfam_fs:GntR Bacterial regulatory proteins, gntR family
ENT72221.1	outer membrane autotransporter barrel domain-containing protein [Brucella abortus RB51-AHVLA]	26.75	228	24.58	4.78		D803_00087	OM	COG3637	1-224 aa pfam_ls:Porin_2 Porin subfamily
ENT73341.1	hypothetical protein D803_01231 [Brucella abortus RB51-AHVLA]	70.31	155	15.69	9.67		D803_01231	OM		126-151 aa prf:ALA_RICH Alanine-rich region profile
ENT73703.1	outer membrane lipoprotein omp16 [Brucella abortus RB51-AHVLA]	68.45	168	18.23	9.92	omp16	D803_01605	OM	COG2885	51-167 aa prf:OMPA_2 OmpA-like domain profile
ENT70772.1	50S ribosomal protein L33 [Brucella abortus RB51-AHVLA]	36.36	55	6.39	10.12	rpmG	D803_02638	C	COG0267	2-53 aa hamap:RL33_MF_00294 50S ribosomal protein L33 [rpmG]
ENT70483.1	hypothetical protein D803_02345 [Brucella abortus RB51-AHVLA]	39.44	284	31.55	5.28		D803_02345	OM	COG3637	3-283 aa pfam_ls:Surface_Ag_2 Surface antigen
ENT74150.1	30S ribosomal protein S20 [Brucella abortus RB51-AHVLA]	29.55	88	9.66	11.63	rpsT	D803_02062	C	COG0268	hamap:RS20_MF_00500 30S ribosomal protein S20 [rpsT]
ENT72848.1	hypothetical protein D803_00722 [Brucella abortus RB51-AHVLA]	30.9	398	42.38	5.08		D803_00722	P
ENT73265.1	hypothetical protein D803_01150 [Brucella abortus RB51-AHVLA]	59.79	194	21.91	10.48		D803_01150	EC	COG4764
ENT71089.1	hypothetical protein D803_02958 [Brucella abortus RB51-AHVLA]	55.56	252	26.39	6.21		D803_02958	C	COG1028	6-175 aa pfam_ls:adh_short short chain dehydrogenase
ENT70263.1	molybdate ABC transporter, periplasmic molybdate-binding protein [Brucella abortus RB51-AHVLA]	44.22	251	26.65	5.67		D803_02125	P	COG0725	31-236 aa pfam_fs:SBP_bac_1 Bacterial extracellular solute-binding protein
ENT72155.1	hypothetical protein D803_00021 [Brucella abortus RB51-AHVLA]	43.57	241	26.74	9.28		D803_00021	IM	COG1376	104-240 aa pfam_ls:YkuD Ykud domain
ENT73649.1	hypothetical protein D803_01544 [Brucella abortus RB51-AHVLA]	52.58	329	35.27	4.92		D803_01544	P*	COG1879
ENT73509.1	periplasmic immunogenic protein [Brucella abortus RB51-AHVLA]	41.6	250	26.55	5.66	bp26	D803_01401	P*	COG2968	40-249 aa pfam_ls:DUF541 Protein of unknown function (DUF541)
ENT70271.1	hypothetical protein D803_02133 [Brucella abortus RB51-AHVLA]	40.6	234	25.68	6.15		D803_02133	P	COG3683	19-227 aa pfam_fs:DUF1007 Protein of unknown function (DUF1007)
ENT72278.1	uroporphyrinogen-III C-methyltransferase [Brucella abortus RB51-AHVLA]	20.41	485	50.93	9.24		D803_00144	C	COG0007; COG1648	234-445 aa pfam_fs:TP_methylase Tetrapyrrole (Corrin/Porphyrin) Methylases
ENT73268.1	50S ribosomal protein L17 [Brucella abortus RB51-AHVLA]	61.27	142	15.63	10.3	rplQ	D803_01153	C	COG0203	5-116 aa hamap:RL17_MF_01368 50S ribosomal protein L17 [rplQ]
ENT70876.1	hypothetical protein D803_02744 [Brucella abortus RB51-AHVLA]	40.7	199	22.25	5.83		D803_02744	C	COG3560	9-178 aa pfam_fs:Nitroreductase Nitroreductase family
ENT73264.1	hypothetical protein D803_01149 [Brucella abortus RB51-AHVLA]	79.55	220	23	9.55		D803_01149	OM	COG2885	113-208 aa pfam_ls:OmpA OmpA family
ENT70362.1	chaperonin [Brucella abortus RB51-AHVLA]	33.7	546	57.51	5.08	groL	D803_02224	C	COG0459	2-544 aa hamap:CH60_MF_00600 60 kDa chaperonin [groL]
ENT73379.1	sulfate ABC transporter, sulfate-binding protein [Brucella abortus RB51-AHVLA]	44.01	334	37.18	5.41		D803_01269	P	COG4150	35-276 aa pfam_fs:SBP_bac_1 Bacterial extracellular solute-binding protein
ENT72674.1	hypothetical protein D803_00545 [Brucella abortus RB51-AHVLA]	65.59	111	11.98	9.04		D803_00545	IM
ENT73304.1	50S ribosomal protein L1 [Brucella abortus RB51-AHVLA]	45.49	233	24.61	9.52	rplA	D803_01189	C	COG0081	2-229 aa hamap:RL1_MF_01318_B 50S ribosomal protein L1 [rplA]
ENT72225.1	hypothetical protein D803_00091 [Brucella abortus RB51-AHVLA]	29.98	626	68.79	8.97		D803_00091	C	COG0513	77-337 aa pre:HELICASE DNA/RNA helicase domain (DEAD/DEAH box)
ENT73226.1	elongation factor Ts [Brucella abortus RB51-AHVLA]	37.38	305	31.49	5.02	tsf	D803_01111	C	COG0264	2-283 aa hamap:EFTS_MF_00050 Elongation factor Ts [tsf]
ENT73228.1	hypothetical protein D803_01113 [Brucella abortus RB51-AHVLA]	38.41	140	15.46	9.96		D803_01113	EC		45-81 aa pfam_fs:CaMKII_AD Calcium/calmodulin dependent protein kinase II Associatio
ENT72429.1	hypothetical protein D803_00299 [Brucella abortus RB51-AHVLA]	23.33	180	19.62	9.84		D803_00299	C	COG5352	1-180 aa pfam_fs:GcrA GcrA cell cycle regulator
ENT72566.1	50S ribosomal protein L9 [Brucella abortus RB51-AHVLA]	51.32	189	20.97	4.86	rplI	D803_00436	C	COG0359	1-147 aa hamap:RL9_MF_00503 50S ribosomal protein L9 [rplI]
ENT70642.1	hypothetical protein D803_02506 [Brucella abortus RB51-AHVLA]	27.76	344	37.5	5.85		D803_02506	P	COG0614	51-319 aa pfam_ls:Peripla_BP_2 Periplasmic binding protein
ENT72188.1	hypothetical protein D803_00054 [Brucella abortus RB51-AHVLA]	27.8	241	25.69	5.04		D803_00054	P	COG2755	54-222 aa pfam_fs:Lipase_GDSL GDSL-like Lipase/Acylhydrolase
ENT70716.1	hypothetical protein D803_02580 [Brucella abortus RB51-AHVLA]	19.62	309	33.08	5.82		D803_02580	P	COG4607	45-283 aa pfam_ls:Peripla_BP_2 Periplasmic binding protein
ENT73017.1	hypothetical protein D803_00896 [Brucella abortus RB51-AHVLA]	43.08	66	6.62	6.09		D803_00896	P	COG2608	1-64 aa prf:HMA_2 Heavy-metal-associated domain profile
ENT72465.1	hypothetical protein D803_00335 [Brucella abortus RB51-AHVLA]	46.86	173	18.03	8.98		D803_00335	EC	COG5342	37-169 aa pfam_ls:IalB Invasion associated locus B (IalB) protein
ENT73704.1	protein tolB [Brucella abortus RB51-AHVLA]	49.21	443	48.52	8.95	tolB	D803_01606	P	COG0823	11-438 aa hamap:TOLB_MF_00671 Protein tolB [tolB]
ENT72516.1	hypothetical protein D803_00386 [Brucella abortus RB51-AHVLA]	28.46	260	26.89	9.71		D803_00386	IM	COG4123	31-210 aa pfam_ls:MTS Methyltransferase small domain
ENT72491.1	hypothetical protein D803_00361 [Brucella abortus RB51-AHVLA]	63.05	204	22.22	9.45		D803_00361	P	COG1651	53-199 aa pfam_ls:DSBA DSBA-like thioredoxin domain
ENT73813.1	30S ribosomal protein S16 [Brucella abortus RB51-AHVLA]	68.66	134	14.54	9.79	rpsP	D803_01715	C	COG0228	2-79 aa hamap:RS16_MF_00385 30S ribosomal protein S16 [rpsP]
ENT72867.1	phosphate acyltransferase [Brucella abortus RB51-AHVLA]	28.62	346	36.96	6.03	plsX	D803_00741	C	COG0416	2-335 aa hamap:PLSX_MF_00019 Fatty acid/phospholipid synthesis protein plsX [plsX]
ENT73502.1	hypothetical protein D803_01393 [Brucella abortus RB51-AHVLA]	30.69	367	40.33	6.33		D803_01393	P	COG3049	37-354 aa pfam_ls:CBAH Linear amide C-N hydrolases, choloylglycine hydrolase family
ENT73460.1	outer membrane assembly lipoprotein YfiO [Brucella abortus RB51-AHVLA]	33.45	287	32.08	8.66	yfiO	D803_01351	OM	COG4105	47-117 aa prf:TPR_REGION TPR repeat region circular profile
ENT70590.1	hypothetical protein D803_02454 [Brucella abortus RB51-AHVLA]	26.72	393	43.31	5.73		D803_02454	P	COG4134
ENT72607.1	hypothetical protein D803_00477 [Brucella abortus RB51-AHVLA]	57.33	217	23.78	6.43		D803_00477	P	COG1651	62-214 aa pfam_ls:DSBA DSBA-like thioredoxin domain
ENT70991.1	hypothetical protein D803_02859 [Brucella abortus RB51-AHVLA]	23.02	177	18.51	5.02		D803_02859	IM	COG4803	60-161 aa pfam_ls:DUF1269 Protein of unknown function (DUF1269)
ENT70689.1	superoxide dismutase [Cu-Zn] [Brucella abortus RB51-AHVLA]	53.66	173	18.13	6.24	sodC	D803_02553	P	COG2032	36-173 aa pfam_fs:Sod_Cu Copper/zinc superoxide dismutase (SODC)
ENT72783.1	hypothetical protein D803_00655 [Brucella abortus RB51-AHVLA]	55.84	318	35.19	9.8		D803_00655	P	COG0760	35-162 aa pfam_ls:SurA_N SurA N-terminal domain
ENT72670.1	hypothetical protein D803_00541 [Brucella abortus RB51-AHVLA]	23.88	238	26.25	8.96		D803_00541	EC	COG1376	98-237 aa pfam_ls:YkuD Ykud domain
ENT73277.1	50S ribosomal protein L18 [Brucella abortus RB51-AHVLA]	45	120	12.66	10.77	rplR	D803_01162	C	COG0256	3-120 aa hamap:RL18_MF_01337_B 50S ribosomal protein L18 [rplR]
ENT73701.1	tol-pal system protein YbgF [Brucella abortus RB51-AHVLA]	49.21	484	51.39	5.23	cpoB	D803_01603	P	COG1729	30-467 aa prf:TPR TPR repeat profile
ENT73274.1	50S ribosomal protein L15 [Brucella abortus RB51-AHVLA]	49.36	156	16.24	10.66	rplO	D803_01159	C	COG0200	1-150 aa hamap:RL15_MF_01341_B 50S ribosomal protein L15 [rplO]
ENT72951.1	hypothetical protein D803_00828 [Brucella abortus RB51-AHVLA]	47.8	159	18.49	6.75		D803_00828	C	COG1522	65-140 aa pfam_fs:AsnC_trans_reg AsnC family
ENT73816.1	lytic murein transglycosylase [Brucella abortus RB51-AHVLA]	46.91	275	29.35	9.41		D803_01718	P*	COG2951
ENT73557.1	hypothetical protein D803_01449 [Brucella abortus RB51-AHVLA]	45.56	180	18.86	6.04		D803_01449	P
ENT71054.1	hypothetical protein D803_02923 [Brucella abortus RB51-AHVLA]	65.51	350	36.62	5.74		D803_02923	P*	COG4213	27-293 aa pfam_ls:Peripla_BP_1 Periplasmic binding proteins and sugar binding domain of the LacI family
ENT73302.1	50S ribosomal protein L7/L12 [Brucella abortus RB51-AHVLA]	59.68	124	12.54	4.79	rplL	D803_01187	P	COG0222	1-124 aa hamap:RL7_MF_00368 50S ribosomal protein L7/L12 [rplL]
ENT72799.1	outer-membrane immunogenic protein [Brucella abortus RB51-AHVLA]	56.81	213	23.15	8.58	omp25	D803_00671	OM	COG3637	8-213 aa pfam_ls:OmpA_membrane OmpA-like transmembrane domain
ENT72924.1	hypothetical protein D803_00801 [Brucella abortus RB51-AHVLA]	56.78	133	14.22	10.03		D803_00801	P
ENT72874.1	hypothetical protein D803_00749 [Brucella abortus RB51-AHVLA]	56.41	195	21.18	9.27		D803_00749	P	COG1596	35-118 aa pfam_ls:Poly_export Polysaccharide biosynthesis/export protein
ENT73383.1	hypothetical protein D803_01274 [Brucella abortus RB51-AHVLA]	53.07	179	19.75	9.57		D803_01274	OM		67-136 aa pat:EF_HAND_1 EF-hand calcium-binding domain
ENT73588.1	hypothetical protein D803_01480 [Brucella abortus RB51-AHVLA]	52.86	227	24.5	6.11		D803_01480	OM	COG3047	41-227 aa pfam_fs:OmpW OmpW family
ENT74019.1	hypothetical protein D803_01931 [Brucella abortus RB51-AHVLA]	51.64	321	33.27	5.43		D803_01931	P	COG2984	28-320 aa pfam_ls:ABC_sub_bind ABC transporter substrate binding protein
ENT73601.1	choline ABC transporter, ATP-binding protein [Brucella abortus RB51-AHVLA]	50.79	348	38.15	5.88		D803_01493	IM	COG4175	21-268 aa prf:ABC_TRANSPORTER_2 ATP-binding cassette, ABC transporter-type domain profile
ENT72913.1	hypothetical protein D803_00790 [Brucella abortus RB51-AHVLA]	50.36	137	14.83	9.87		D803_00790	P
ENT73646.1	dihydroxyacetone kinase, L subunit [Brucella abortus RB51-AHVLA]	43.43	213	22.17	4.8		D803_01541	C	COG2376	33-206 aa pfam_ls:Dak2 DAK2 domain
ENT73886.1	50S ribosomal protein L19 [Brucella abortus RB51-AHVLA]	38.62	145	16.07	9.9	rplS	D803_01795	C	COG0335	3-119 aa hamap:RL19_MF_00402 50S ribosomal protein L19 [rplS]
ENT73722.1	UPF0082 protein [Brucella abortus RB51-AHVLA]	36.98	248	26.94	4.94		D803_01624	C	COG0217	3-238 aa hamap:YEEN_MF_00693 UPF0082 protein yeeN [yeeN]
ENT72921.1	Grx4 family monothiol glutaredoxin [Brucella abortus RB51-AHVLA]	36.15	110	12.13	5.04		D803_00798	C	COG0278	5-107 aa prf:GLUTAREDOXIN_2 Glutaredoxin domain profile
ENT74069.1	thioredoxin C-1 [Brucella abortus RB51-AHVLA]	35.51	107	11.42	4.53	trxA	D803_01981	C	COG3118	2-105 aa pfam_ls:Thioredoxin Thioredoxin
ENT74140.1	hypothetical protein D803_02052 [Brucella abortus RB51-AHVLA]	68.25	190	20.96	9.26		D803_02052	P	COG3807	54-182 aa pfam_ls:SH3_3 Bacterial SH3 domain
ENT72711.1	hypothetical protein D803_00582 [Brucella abortus RB51-AHVLA]	29.87	436	47.66	6.17		D803_00582	IM	COG0642	326-434 aa pfam_ls:HATPase_c Histidine kinase-, DNA gyrase B-, and HSP90-like ATPase
ENT72880.1	30S ribosomal protein S9 [Brucella abortus RB51-AHVLA]	27.22	158	17.17	10.34	rpsI	D803_00755	C	COG0103	29-158 aa hamap:RS9_MF_00532_B 30S ribosomal protein S9 [rpsI]
ENT73602.1	hypothetical protein D803_01494 [Brucella abortus RB51-AHVLA]	23.38	282	31.33	9.04		D803_01494	IM	COG1123	6-255 aa prf:ABC_TRANSPORTER_2 ATP-binding cassette, ABC transporter-type domain profile
ENT70649.1	hypothetical protein D803_02513 [Brucella abortus RB51-AHVLA]	20.82	411	45	4.88		D803_02513	P	COG1653	33-327 aa pfam_fs:SBP_bac_1 Bacterial extracellular solute-binding protein
ENT73301.1	DNA-directed RNA polymerase subunit beta [Brucella abortus RB51-AHVLA]	15.76	1377	153.66	5.03	rpoB	D803_01186	C	COG0085	34-1364 aa hamap:RPOB_MF_01321 DNA-directed RNA polymerase subunit beta [rpoB]
	*membrane-bound protein
	C: cytoplasmic protein
	EC: extracellular protein
	P: periplasmic protein
	OM: outer membrane
	IM: inner membrane
